# Supplementary material
Source: publisher figshare collection journal article supplement (https://acs.figshare.com/ndownloader/files/23991064)
Supplement: Supplementary file 1 [file 23991064]

# Stereochemical differences in fluorocyclopropyl amides enable tuning of Btk inhibition and off-target activity

James J. Crawford\*, Wendy Lee\*, Adam R. Johnson, Kelly J. Delatorre, Charles Eigenbrot, Julia Heidmann, Satoko Kakiuchi-Kiyota, Arna Katewa, Jim Kiefer, Lichuan Liu, Joseph W. Lubach, Dinah Misner, Hans Purkey, Karin Reif, Jennifer Vogt, Harvey Wong, Christine Yu, Wendy B. Young

## Supporting Information

### Table of contents:

|                                                                                                  |           |
|--------------------------------------------------------------------------------------------------|-----------|
| Title page                                                                                       | S1        |
| Chemistry                                                                                        | S2 – S30  |
| In vitro pharmacology                                                                            | S31       |
| In vitro ADME assays                                                                             | S32 – S33 |
| Solubility assay                                                                                 | S33       |
| hERG automatic patch clamp assay                                                                 | S34       |
| iPSC-derived cardiomyocyte multi-electrode array assay                                           | S34       |
| Pharmacokinetics study protocols                                                                 | S35 – S37 |
| Animal care and animal care statement                                                            | S37       |
| Table S1. Broad panel of 220 human kinases of <b>25</b>                                          | S38       |
| Table S2. Comparison of kinome selectivity of <b>25</b> vs. <b>6</b> against the top kinase hits | S39       |
| Crystallography                                                                                  | S41       |
| Table S3: BTK crystallographic data collection and refinement statistics                         | S42       |
| SI References                                                                                    | S43       |

## CHEMISTRY

All chemicals were used directly as received from commercial suppliers.  $^1\text{H}$  NMR spectra were recorded on Bruker Avance 400 or 500 MHz spectrometers. Chemical shifts are expressed in  $\delta$  ppm referenced to an internal standard, tetramethylsilane ( $\delta = 0$  ppm). Abbreviations used in describing peak signals are: br = broad signal, s = singlet, d = doublet, dd = doublet of doublets, t = triplet, q = quartet, m = multiplet. All final compounds were purified to  $> 95\%$  by reverse phase high performance liquid chromatography (HPLC), supercritical fluid chromatography (SFC) or normal phase silica gel flash chromatography. The purity was assessed by reverse phase HPLC with a gradient of 5–95% acetonitrile in water (with either acid or base modifier) and monitored by absorption at 254 nm. Low-resolution mass spectra were recorded on liquid chromatography-mass spectrometer in electrospray positive (ES+) mode. HRMS experiments were performed on Dionex LC Ultimate3000 coupled with ThermoScientific Q Exactive orbitrap mass spectrometer using ESI as ionization source and a Phenomenex XB-C18, 1.7mm,  $50 \times 2.1$  mm column with a 0.7 ml / minute flow rate at 40 °C for LC separation. Solvent A is water with 0.1% FA and solvent B is acetonitrile with 0.1% FA. The gradient consisted with 2 - 98% solvent B over 7 min and hold 98%B for 1.5 min following equilibration for 1.0 min. The LC was monitored by absorption at 220nm and 254nm. MS full scan with 10,000 resolution was applied to all experiments.

Scheme S1. Preparation of **25**.<sup>a</sup>

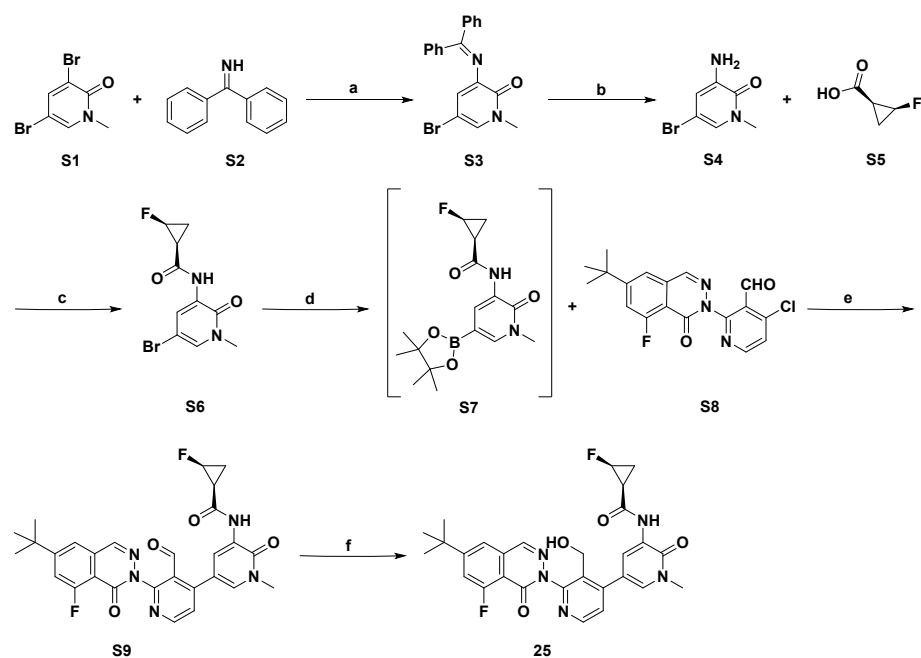

<sup>a</sup>Reagents and conditions: (a)  $\text{Pd}_2(\text{dba})_3$ , XantPhos,  $\text{Cs}_2\text{CO}_3$ , toluene, 120 °C, 18 h, 68.5% yield; (b) 1N HCl, THF, MeOH, RT, 2h, 70.6% yield; (c) HATU, DIPEA, DMF, 60 °C, 83.2% yield;

(d)  $\text{Pin}_2\text{B}_2$ , KOAc, XPhos,  $\text{Pd}_2(\text{dba})_3$ , dioxane, microwave, 100 °C, 30 min (e)  $\text{K}_3\text{PO}_4 \cdot 3\text{H}_2\text{O}$ , 80 °C, microwave, 1 h, 38.6% yield over 2 steps; (f)  $\text{NaBH}_4$ , MeOH, 68.5% yield.

(1*S*,2*S*)-*N*-(2'-(6-(*tert*-butyl)-8-fluoro-1-oxophthalazin-2(1*H*)-yl)-3'-(hydroxymethyl)-1-methyl-6-oxo-1,6-dihydro-[3,4'-bipyridin]-5-yl)-2-fluorocyclopropane-1-carboxamide **25**

Step 1: 5-bromo-3-((diphenylmethylene)amino)-1-methylpyridin-2(1*H*)-one **S3**

To a vessel with screwed cap charged with 3,5-dibromo-1-methyl-pyridin-2-one (4.0 g, 15.0 mmol),  $\text{Cs}_2\text{CO}_3$  (8.70 g, 45.1 mmol, 3.0 equiv.), tris(dibenzylideneacetone)dipalladium (0) (482 mg, 0.53 mmol, 0.035 equiv.), and XantPhos (870 mg, 1.5 mmol, 0.10 equiv.) was added a solution of diphenylmethanimine (3.27 g, 18.0 mmol, 1.2 equiv.) in toluene (50 mL). The reaction mixture was degassed for 15 min, vacuum purged and backfilled with  $\text{N}_2$  (3x). The vessel was capped, and the reaction mixture was stirred at 140 °C for 16h. The reaction mixture was diluted with ethyl acetate and filtered through a pad of Celite. The filtrate was washed with water and brine, dried over  $\text{Na}_2\text{SO}_4$ , filtered, and concentrated under reduced pressure. The resulting residue was purified by flash column chromatography ( $\text{SiO}_2$ : ethyl acetate / heptane) to afford 3.78 g of **S3** as yellow solid. Yield: 68.5%.  $^1\text{H}$  NMR (400 MHz, Chloroform-*d*)  $\delta$  7.79 - 7.71 (m 2H), 7.51 - 7.41 (m, 1H), 7.41 - 7.30 (m, 6H), 7.28 - 7.20 (m, 1H), 7.03 (d,  $J = 2.7$  Hz, 1H), 6.64 (d,  $J = 2.5$  Hz, 1H), 3.45 (s, 3H). MS [ES-MS] (ESI+):  $m/z$  calcd for  $\text{C}_{19}\text{H}_{16}\text{BrN}_2\text{O}$  [ $\text{M} + \text{H}$ ] $^+$ , 367.2; found, 367.

Step 2: 3-amino-5-bromo-1-methylpyridin-2(1*H*)-one **S4**

To a stirred solution of 3-(benzhydrylideneamino)-5-bromo-1-methyl-pyridin-2-one **S3** (1.0 g, 2.72 mmol) dissolved in tetrahydrofuran (13.6 mL) and methanol (2.7 mL) was added 1M HCl (2.0 mL, 3.0 equiv.), and the reaction mixture was stirred at room temperature for 2h. Volatile solvent was then evaporated under reduced pressure, and the crude reaction was basified with sat.  $\text{NaHCO}_3$  solution until neutral pH and extracted with ethyl acetate (3x). The combined organic layers were washed with water and brine, dried over  $\text{Na}_2\text{SO}_4$ , filtered, and concentrated under reduced pressure. The resulting residue was purified by flash column chromatography ( $\text{SiO}_2$ : ethyl acetate / heptane) to afford 390.5 mg of **S4** as a white solid. Yield: 70.6 %.  $^1\text{H}$  NMR (400 MHz, Chloroform-*d*)  $\delta$  6.82 (d,  $J = 2.3$  Hz, 1H), 6.55 (d,  $J = 2.3$  Hz, 1H), 4.34 (br s, 2H), 3.54 (s, 3H). MS [ES-MS] (ESI+):  $m/z$  calcd for  $\text{C}_6\text{H}_8\text{BrN}_2\text{O}$  [ $\text{M} + \text{H}$ ] $^+$ , 203; found, 203.

Step 3: (1*S*,2*S*)-*N*-(5-bromo-1-methyl-2-oxo-1,2-dihydropyridin-3-yl)-2-fluorocyclopropane-1-carboxamide **S6**

A mixture of 3-amino-5-bromo-1-methyl-pyridin-2-one **S4** (389 mg, 1.92 mmol), (1*S*,2*S*)-2-fluorocyclopropanecarboxylic acid **S5** (300 mg, 2.88 mmol, 1.5 equiv.), HATU (1.24 g, 3.26 mmol, 1.7 equiv.), and DIPEA (992 mg, 7.67 mmol, 4.0 equiv.) in DMF (9.6 mL) was stirred at 60 °C under N<sub>2</sub> for 16h. The reaction was quenched with water and extracted with 1:1 v/v ether / ethyl acetate (3x). The combined organic layers were washed with water and brine, dried over Na<sub>2</sub>SO<sub>4</sub>, filtered, and concentrated under reduced pressure. The resulting residue was purified by flash column chromatography (SiO<sub>2</sub>: ethyl acetate / heptane) to afford 461 mg of **S6** as a white solid. Yield: 83.2 %. <sup>1</sup>H NMR (400 MHz, Chloroform-*d*) δ 8.63 (br s, 1H), 8.51 (d, J = 2.5 Hz, 1H), 7.13 (d, J = 2.5 Hz, 1H), 4.89 – 4.65 (m, 1H), 3.58 (s, 3H), 1.95 – 1.80 (m, 2H), 1.28 – 1.15 (m, 1H). MS [ES-MS] (ESI+): m/z calcd for C<sub>10</sub>H<sub>11</sub>BrFN<sub>2</sub>O<sub>2</sub> [M + H]<sup>+</sup>, 289; found, 289.

Step 4: (1*S*,2*S*)-*N*-(2'-(6-(*tert*-butyl)-8-fluoro-1-oxophthalazin-2(1*H*)-yl)-3'-formyl-1-methyl-6-oxo-1,6-dihydro-[3,4'-bipyridin]-5-yl)-2-fluorocyclopropane-1-carboxamide **S9**

A vial was charged with (1*S*,2*S*)-*N*-(5-bromo-1-methyl-2-oxo-1,2-dihydropyridin-3-yl)-2-fluorocyclopropane-1-carboxamide **S6** (726 mg, 2.51 mmol, 1.0 equiv.), bis(pinacolato)diboron (829 mg, 3.26 mmol, 1.3 equiv.), KOAc (493 mg, 5.02 mmol, 2.0 equiv.), XPhos (122 mg, 0.25 mmol, 0.1 equiv.), and tris(dibenzylideneacetone)dipalladium (0) (115 mg, 0.126 mmol, 0.05 equiv.). Degassed 1,4-dioxane (16 mL) was added, and the reaction mixture was vacuum purged / backfilled with N<sub>2</sub> (3x). The vial was capped and the reaction mixture was microwaved at 100 °C for 30 min and cooled to room temperature. To this was added 2-(6-*tert*-butyl-8-fluoro-1-oxophthalazin-2-yl)-4-chloro-pyridine-3-carbaldehyde **S8** (904 mg, 2.51 mmol, 1.0 equiv.) followed by a solution of potassium phosphate tribasic (1.37 g, 6.28 mmol, 2.5 equiv.) in water (2.5 mL). The reaction mixture was vacuum purged/ back-filled with N<sub>2</sub> (3x), and the vial was capped. The reaction mixture was then microwaved at 80 °C for 30 min and quenched with EtOAc and filtered. The organic layer was washed with water and brine, dried over Na<sub>2</sub>SO<sub>4</sub>, filtered, and concentrated under reduced pressure. The resulting residue was purified by flash column chromatography (SiO<sub>2</sub>: methanol / ethyl acetate) to afford 516.7 mg of **S9** as a foam. Yield: 38.6 %. <sup>1</sup>H NMR (400 MHz, Chloroform-*d*) δ 9.97 (s, 1H), 8.76 (d, J = 5.1 Hz, 1H), 8.69 (s, 1H), 8.60 (d, J = 2.4 Hz, 1H), 8.26 (d, J = 2.5 Hz, 1H), 7.56 – 7.44 (m, 3H), 7.10 (d, J = 2.4 Hz, 1H), 4.90 – 4.67 (m, 1H), 3.65 (s, 3H), 1.95 – 1.86 (m, 2H), 1.40 (s, 9H), 1.29 – 1.15 (m, 1H). MS [ES-MS] (ESI+): m/z calcd for C<sub>28</sub>H<sub>26</sub>F<sub>2</sub>N<sub>5</sub>O<sub>4</sub> [M + H]<sup>+</sup>, 534.2; found, 534.2.

Step 5: (1*S*,2*S*)-*N*-(2'-(6-(*tert*-butyl)-8-fluoro-1-oxophthalazin-2(1*H*)-yl)-3'-(hydroxymethyl)-1-methyl-6-oxo-1,6-dihydro-[3,4'-bipyridin]-5-yl)-2-fluorocyclopropane-1-carboxamide **25**

To ((1*S*,2*S*)-*N*-(2'-(6-(*tert*-butyl)-8-fluoro-1-oxophthalazin-2(1*H*)-yl)-3'-formyl-1-methyl-6-oxo-1,6-dihydro-[3,4'-bipyridin]-5-yl)-2-fluorocyclopropane-1-carboxamide **S9** (1.04 g, 1.95 mmol) in anhydrous MeOH (49 mL) at 0 °C was added sodium borohydride (185 mg, 4.88 mmol, 2.500 equiv.) portionwise over 30 min. The reaction mixture was stirred at 0 °C for 1h and at RT for 2h, then quenched with water. Volatile solvent was removed under reduced pressure, and the crude reaction was diluted with ethyl acetate. The organic layer was washed with water and brine, dried over Na<sub>2</sub>SO<sub>4</sub>, filtered, and concentrated under reduced pressure. The resulting residue was purified by flash column chromatography (SiO<sub>2</sub>: MeOH / EtOAc) followed by crystallization from EtOAc / hexane to obtain 716.9 mg of the title compound **25** as a white solid. Yield: 68.5%. <sup>1</sup>H NMR (400 MHz, DMSO-*d*<sub>6</sub>) δ 9.75 (s, 1H), 8.56 (d, *J* = 5.2 Hz, 1H), 8.52 (d, *J* = 2.5 Hz, 1H), 8.41 (d, *J* = 2.4 Hz, 1H), 7.89 (d, *J* = 2.0 Hz, 1H), 7.80 – 7.74 (m, 2H), 7.49 (d, *J* = 5.0 Hz, 1H), 5.01 – 4.78 (m, 2H), 4.40 (t, *J* = 4.7 Hz, 2H), 3.60 (s, 3H), 2.49 – 2.43 (m, 1H), 1.67 – 1.53 (m, 1H), 1.39 (s, 9H), 1.20 – 1.09 (m, 1H). <sup>13</sup>C NMR (101 MHz, DMSO) δ 166.29 (d), 161.76, 160.02 (d), 159.15, 156.34, 155.59 (d), 153.78, 148.22, 147.98, 137.68, 132.45, 131.98, 131.09, 128.22, 125.34, 123.51, 119.68, 117.00, 116.80, 114.91, 113.86 (d), 73.66, 56.37, 37.61, 35.58, 30.49, 21.40 (d), 10.78 (d). HRMS (ESI+) *m/z* found MH<sup>+</sup> 536.2099, C<sub>28</sub>H<sub>28</sub>F<sub>2</sub>N<sub>5</sub>O<sub>4</sub> requires 536.2104. Chiral t<sub>R</sub> = 1.091 min (Chiralpak IB-N, isocratic 45% MeOH w/ 0.1% NH<sub>4</sub>OH / CO<sub>2</sub>, 4 mL/min flow, 2.5 min at 40 °C, 120 bar). [α]<sub>D</sub><sup>20</sup> = -12.57 (c = 1.67 mg/mL, MeOH).

Scheme S2. Preparation of **7**.<sup>a</sup>

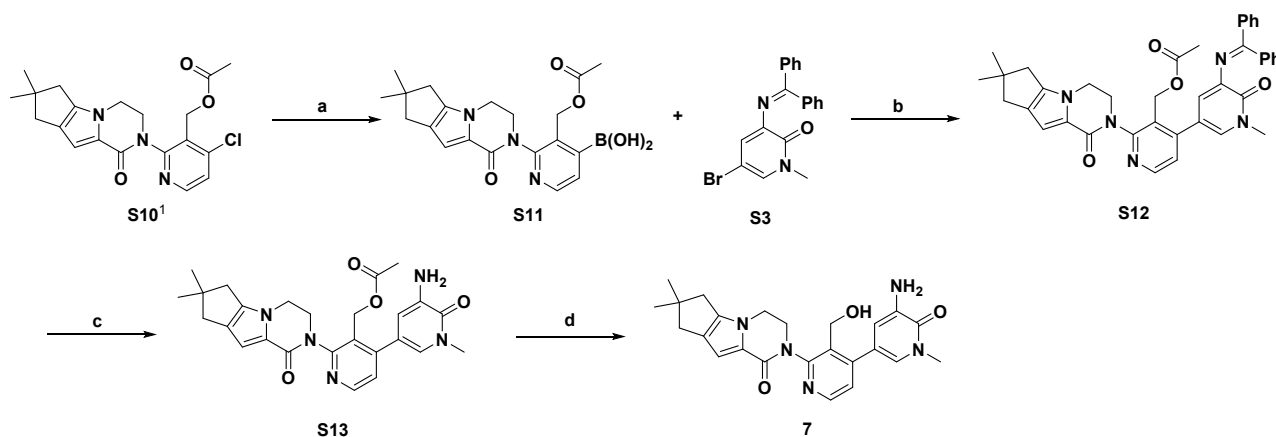

<sup>a</sup>Reagents and conditions: (a)  $\text{Pin}_2\text{B}_2$ , KOAc, XPhos,  $\text{PdCl}_2(\text{dppf})$ , dioxane, 65 °C, 4 h, 65% yield; (b)  $\text{PdCl}_2(\text{dppf})$ , NaOAc,  $\text{K}_3\text{PO}_4 \cdot 3\text{H}_2\text{O}$ , ACN,  $\text{H}_2\text{O}$ , 80 °C, 1 h, 47% yield; (c) HCl in dioxane, 0 °C, 0.5h, 60% yield; (d) LiOH,  $i\text{PrOH/THF}$ ,  $\text{H}_2\text{O}$ , 40°C, 0.5 h, 36% yield.

2-(5-amino-3'-(hydroxymethyl)-1-methyl-6-oxo-1,6-dihydro-[3,4'-bipyridin]-2'-yl)-7,7-dimethyl-3,4,7,8-tetrahydro-2*H*-cyclopenta[4,5]pyrrolo[1,2-a]pyrazin-1(6*H*)-one **7**

#### Step 1. Preparation of **S11**.

In a 250-mL single-neck round-bottomed flask equipped with a magnetic stirrer and a reflux condenser was charged with **S10**<sup>1</sup> (4.5 g, 11.6 mmol) [1434051-95-2], bis(pinacolato)diboron (7.38 g, 29.0 mmol, 2.5 equiv.),  $\text{PdCl}_2(\text{dppf})$  (473 mg, 0.58 mmol, 0.05 equiv.), Xphos (470 mg, 1.16 mmol, 0.1 equiv.), potassium acetate (3.41 g., 34.8 mmol, 3.0 equiv.), and dioxane (100 mL). After three cycles of vacuum/argon flush, the reaction mixture was heated at 65 °C for 4h, cooled to room temperature, and filtered. The filtrate was concentrated under reduced pressure to afford crude **S11** as a brown-red liquid (4.0 g, 86.8%). MS (ESI+)  $m/z$  found  $\text{MH}^+$  398.3,  $\text{C}_{20}\text{H}_{25}\text{BN}_3\text{O}_5$  requires 388.2.

#### Step 2. Preparation of **S12**.

A 100-mL single-neck round-bottomed flask equipped with a magnetic stirrer and a reflux condenser was charged with **S3** (1.0 g, 2.70 mmol), **S11** (1.20 g, 3.00 mmol, 1.1 equiv.),  $\text{PdCl}_2(\text{dppf})$  (122 mg, 0.15 mmol, 0.056 equiv.), NaOAc (460 mg, 5.4 mmol, 2.0 equiv.),  $\text{K}_3\text{PO}_4 \cdot 3\text{H}_2\text{O}$  (1.27 g, 5.4 mmol, 2.0 equiv.),  $\text{H}_2\text{O}$  (1 mL), and ACN (30 mL). After three cycles of vacuum/argon flush, the reaction mixture was heated at 80°C for 1 h, cooled to room temperature, and filtered. The filtrate was concentrated under reduced pressure, and the crude was purified by column chromatography ( $\text{SiO}_2$ : 20:1 DCM/MeOH) to afford **S12** as a yellow solid (800 mg, 47%). MS (ESI+)  $m/z$  found  $\text{MH}^+$  640.3,  $\text{C}_{39}\text{H}_{38}\text{N}_5\text{O}_4$  requires 640.3.

#### Step 3. Preparation of **S13**.

A mixture of **S12** (800 mg, 1.25 mmol) in HCl in dioxane (4M, 20 mL) was stirred at 0°C for 0.5 h. The reaction mixture was evaporated *in vacuo*, and the residue was purified by reverse-phase prep-HPLC to afford **S13** as a pale yellow solid (350 mg, 60%). <sup>1</sup>H NMR (500 MHz,  $\text{DMSO}-d_6$ )  $\delta$  8.43 (d,  $J = 5.0$  Hz, 1H), 7.09 (d,  $J = 5.0$  Hz, 1H), 6.81 (d,  $J = 2.0$  Hz, 1H), 6.77 (s, 1H), 6.57 (d,  $J = 2.0$  Hz, 1H), 6.24-6.22 (m, 1H), 5.13-5.11 (m, 1H), 4.51-4.47 (m, 1H), 4.36 (s, 2H), 4.24-4.20 (m, 1H), 4.14-4.11 (m, 1H), 4.01-3.98 (m, 1H), 3.62 (s, 3H), 2.55-2.54 (m, 2H),

2.49 (s, 2H), 1.81 (s, 3H), 1.26 (s, 6H). MS (ESI+)  $m/z$  found  $MH^+$  476.1,  $C_{26}H_{30}N_5O_4$  requires 476.2.

#### Step 4. Preparation of 7.

A mixture of **S13** (1.1 g, 2.3 mmol) and LiOH (450 mg, 11.0 mmol, 4.8 equiv.) in  $i$ PrOH/THF (1:1, 10 mL) and  $H_2O$  (2.5 mL) was stirred at 40 °C for 0.5 h. The mixture was evaporated *in vacuo*. The residue was partitioned between EtOAc and water. The combined EtOAc extract was concentrated under reduced pressure. The residue was purified by column chromatography ( $SiO_2$ : 10:1 DCM/MeOH) to afford the title compound **7** as a pale yellow solid (350 mg, 36%).  $^1H$  NMR (500 MHz,  $CDCl_3$ )  $\delta$  8.44 (d,  $J = 5.0$  Hz, 1H), 7.59 (d,  $J = 2.0$  Hz, 1H), 7.21 (d,  $J = 5.0$  Hz, 1H), 6.83 (s, 1H), 6.82 (d,  $J = 2.0$  Hz, 1H), 5.04-5.03(m, 1H), 4.63-4.62 (m, 1H), 4.50-4.48 (m, 1H), 4.30-4.28 (m, 1H), 4.16-4.10 (m, 3H), 3.87-3.85 (m, 1H), 3.65 (s, 3H), 2.57-2.56 (m, 2H), 2.50 (s, 2H), 1.26 (s, 6H). MS (ESI+)  $m/z$  found  $MH^+$  434.2,  $C_{24}H_{28}N_5O_3$  requires 434.2.

Amides **9 – 12, 14, 15, 18 – 21, 23, 24, 26, 30 – 32** were prepared in a parallel fashion by HATU coupling of advanced intermediates **7** or **S15** with the corresponding carboxylic acids (Scheme S3). Amides **8** and **13** were prepared from Suzuki coupling of bromide **S16a** or **S16b** with boronic acid **S17**<sup>1</sup> to give the acetylated intermediates **S18a** or **S18b**, respectively, which was then treated with lithium hydroxide in  $i$ PrOH/THF/ $H_2O$  to afford the desired alcohols **7** or **13**, respectively (Scheme S4). For compounds **16, 33, and 34**, we employed the one-pot borylation / Suzuki coupling methodology described for the synthesis of **25** starting from bromo intermediates **S19, S6, and S21**<sup>3</sup> to generate the desired alcohols, respectively (Scheme S5 and S6).

Scheme S3. Preparation of **9 – 12, 14, 15, 18 – 20, 23, 24, 26, 27, 30 – 32**.<sup>a</sup>

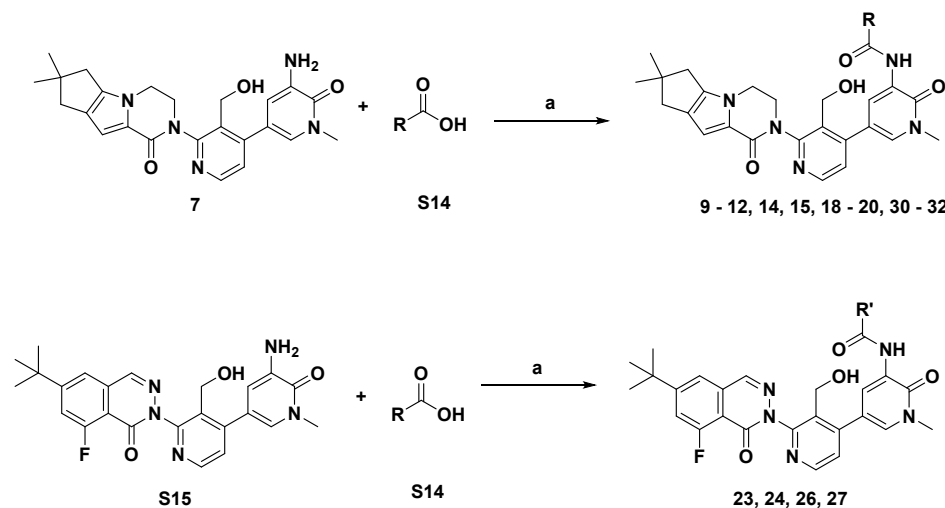

<sup>a</sup> Reagents and conditions: (a) HATU, DIPEA, DMF, 50 °C, 18h, 11.5 – 54% yield.

Representative library synthesis: Preparation of **9** – **12**, **14**, **15**, **17** – **20**, **23**, **24**, **26**, **27**, **30** – **32**.

*N*-(2'-(7,7-dimethyl-1-oxo-1,3,4,6,7,8-hexahydro-2*H*-cyclopenta[4,5]pyrrolo[1,2-*a*]pyrazin-2-yl)-3'-(hydroxymethyl)-1-methyl-6-oxo-1,6-dihydro-[3,4'-bipyridin]-5-yl)acetamide **9**

A screw-capped vial was charged with 2-(5-amino-3'-(hydroxymethyl)-1-methyl-6-oxo-1,6-dihydro-[3,4'-bipyridin]-2'-yl)-7,7-dimethyl-3,4,7,8-tetrahydro-2*H*-cyclopenta[4,5]pyrrolo[1,2-*a*]pyrazin-1(6*H*)-one **7** (50 mg, 0.115 mmol), acetic acid (9.0 mg, 0.345 mmol, 1.3 equiv.), HATU (66.5 mg, 0.173 mmol, 1.5 equiv.), DIPEA (45.2 mg, 0.346 mmol, 3 equiv.), and DMF (1 mL). The capped vial was sealed, and the reaction mixture was stirred at 50 °C for 18h. Solvent was concentrated under reduced pressure, and the crude was purified by reverse phase HPLC to give 15.4 mg (28.1% yield) of **9** as a white solid. <sup>1</sup>H NMR (400 MHz, DMSO-*d*<sub>6</sub>) δ 9.37 (s, 1H), 8.47 (d, *J* = 5.0 Hz, 1H), 8.43 (d, *J* = 2.4 Hz, 1H), 7.72 (d, *J* = 2.5 Hz, 1H), 7.29 (d, *J* = 5.1 Hz, 1H), 6.55 (s, 1H), 4.92 (t, *J* = 5.3 Hz, 1H), 4.42 – 4.36 (m, 2H), 4.29 – 4.14 (m, 3H), 3.90 – 3.80 (m, 1H), 3.58 (s, 3H), 2.57 (d, *J* = 7.5 Hz, 2H), 2.43 (s, 2H), 2.14 (s, 3H), 1.22 (s, 6H). HRMS (ESI+) *m/z* found MH<sup>+</sup> 476.2290, C<sub>26</sub>H<sub>30</sub>N<sub>5</sub>O<sub>4</sub> requires 476.2292.

The following compounds were prepared using the procedure described for **9** and replacing acetic acid with the appropriate carboxylic acids:

*N*-(2'-(7,7-dimethyl-1-oxo-1,3,4,6,7,8-hexahydro-2*H*-cyclopenta[4,5]pyrrolo[1,2-*a*]pyrazin-2-yl)-3'-(hydroxymethyl)-1-methyl-6-oxo-1,6-dihydro-[3,4'-bipyridin]-5-yl)propionamide **10**: Yield 40.7%. <sup>1</sup>H NMR (400 MHz, DMSO-*d*<sub>6</sub>) δ 9.26 (s, 1H), 8.47 (d, *J* = 5.0 Hz, 1H), 8.45 (d, *J* = 2.4 Hz, 1H), 7.73 (d, *J* = 2.4 Hz, 1H), 7.30 (d, *J* = 5.1 Hz, 1H), 6.56 (s, 1H), 4.96 – 4.89 (m, 1H), 4.47 – 4.33 (m, 2H), 4.30 – 4.14 (m, 3H), 3.90 – 3.81 (m, 1H), 3.58 (s, 3H), 2.57 (d, *J* = 7.3 Hz, 2H), 2.48 (q, *J* = 7.5 Hz, 2H), 2.43 (s, 2H), 1.22 (s, 6H), 1.05 (t, *J* = 7.5 Hz, 3H). HRMS (ESI+) *m/z* found MH<sup>+</sup> 490.2446, C<sub>27</sub>H<sub>32</sub>N<sub>5</sub>O<sub>4</sub> requires 490.2449.

*N*-(2'-(7,7-dimethyl-1-oxo-1,3,4,6,7,8-hexahydro-2*H*-cyclopenta[4,5]pyrrolo[1,2-*a*]pyrazin-2-yl)-3'-(hydroxymethyl)-1-methyl-6-oxo-1,6-dihydro-[3,4'-bipyridin]-5-yl)butyramide **11**: Yield 41.2%. <sup>1</sup>H NMR (400 MHz, DMSO-*d*<sub>6</sub>) δ 9.27 (s, 1H), 8.47 (d, *J* = 5.0 Hz, 1H), 8.45 (d, *J* = 2.3 Hz, 1H), 7.73 (d, *J* = 2.3 Hz, 1H), 7.30 (d, *J* = 5.1 Hz, 1H), 6.56 (s, 1H), 4.97 – 4.92 (m, 1H), 4.47 – 4.33 (m, 2H), 4.30 – 4.12 (m, 3H), 3.90 – 3.80 (m, 1H), 3.58 (s, 3H), 2.64 – 2.52 (m, 2H), 2.45 (d, *J* = 7.3 Hz, 1H), 2.42 (s, 3H), 1.58 (h, *J* = 7.3 Hz, 2H), 1.22 (s, 6H), 0.89 (t, *J* = 7.3 Hz, 3H).



$^{13}\text{C}$  NMR (101 MHz, DMSO)  $\delta$  172.31, 159.22, 156.41, 154.66, 147.88, 147.74, 140.90, 132.06, 130.65, 128.04, 125.77, 125.56, 123.47, 123.41, 115.64, 108.86, 57.20, 47.79, 45.30, 41.95, 40.71, 38.96, 37.99, 37.59, 30.16, 30.05, 18.53, 13.54. HRMS (ESI+)  $m/z$  found  $\text{MH}^+$  504.2601,  $\text{C}_{28}\text{H}_{34}\text{N}_5\text{O}_4$  requires 504.2605.

*N*-(2'-(7,7-dimethyl-1-oxo-1,3,4,6,7,8-hexahydro-2*H*-cyclopenta[4,5]pyrrolo[1,2-*a*]pyrazin-2-yl)-3'-(hydroxymethyl)-1-methyl-6-oxo-1,6-dihydro-[3,4'-bipyridin]-5-yl)isobutyramide **12**: Yield 11.5%.  $^1\text{H}$  NMR (400 MHz, DMSO- $d_6$ )  $\delta$  9.23 (s, 1H), 8.47 (d,  $J = 5.0$  Hz, 1H), 8.44 (d,  $J = 2.4$  Hz, 1H), 7.74 (d,  $J = 2.4$  Hz, 1H), 7.30 (d,  $J = 5.0$  Hz, 1H), 6.56 (s, 1H), 4.98 – 4.90 (m, 1H), 4.49 – 4.33 (m, 2H), 4.30 – 4.11 (m, 3H), 3.89 – 3.81 (m, 1H), 3.58 (s, 3H), 2.95 – 2.84 (m, 1H), 2.60 – 2.56 (m, 2H), 2.43 (s, 2H), 1.22 (s, 6H), 1.08 (d,  $J = 6.8$  Hz, 6H). HRMS (ESI+)  $m/z$  found  $\text{MH}^+$  504.2602,  $\text{C}_{28}\text{H}_{34}\text{N}_5\text{O}_4$  requires 504.2605.

2-Cyclopropyl-*N*-(2'-(7,7-dimethyl-1-oxo-1,3,4,6,7,8-hexahydro-2*H*-cyclopenta[4,5]pyrrolo[1,2-*a*]pyrazin-2-yl)-3'-(hydroxymethyl)-1-methyl-6-oxo-1,6-dihydro-[3,4'-bipyridin]-5-yl)acetamide **14**: Yield 29.4%.  $^1\text{H}$  NMR (400 MHz, DMSO- $d_6$ )  $\delta$  9.27 (s, 1H), 8.51 – 8.44 (m, 2H), 7.73 (d,  $J = 2.4$  Hz, 1H), 7.30 (d,  $J = 5.0$  Hz, 1H), 6.56 (s, 1H), 4.97 – 4.87 (m, 1H), 4.47 – 4.33 (m, 2H), 4.32 – 4.13 (m, 3H), 3.85 – 3.65 (m, 1H), 3.59 (s, 3H), 2.57 (d,  $J = 7.5$  Hz, 2H), 2.43 (s, 2H), 2.37 (d,  $J = 7.1$  Hz, 2H), 1.22 (s, 6H), 1.08 – 0.94 (m, 1H), 0.56 – 0.46 (m, 2H), 0.26 – 0.17 (m, 2H). HRMS (ESI+)  $m/z$  found  $\text{MH}^+$  516.2599,  $\text{C}_{29}\text{H}_{34}\text{N}_5\text{O}_4$  requires 516.2605.

*N*-(2'-(7,7-dimethyl-1-oxo-1,3,4,6,7,8-hexahydro-2*H*-cyclopenta[4,5]pyrrolo[1,2-*a*]pyrazin-2-yl)-3'-(hydroxymethyl)-1-methyl-6-oxo-1,6-dihydro-[3,4'-bipyridin]-5-yl)oxetane-3-carboxamide **15**: Yield 12.0%.  $^1\text{H}$  NMR (400 MHz, DMSO- $d_6$ )  $\delta$  9.52 (s, 1H), 8.53 (d,  $J = 2.5$  Hz, 1H), 8.48 (d,  $J = 5.0$  Hz, 1H), 7.76 (d,  $J = 2.5$  Hz, 1H), 7.32 (d,  $J = 5.0$  Hz, 1H), 6.60 – 6.55 (m, 2H), 4.94 (t,  $J = 5.3$  Hz, 1H), 4.70 – 4.62 (m, 3H), 4.46 – 4.38 (m, 2H), 4.30 – 4.16 (m, 3H), 3.87 (s, 1H), 3.58 (s, 3H), 2.58 (d,  $J = 7.1$  Hz, 2H), 2.43 (s, 3H), 1.22 (s, 6H). HRMS (ESI+)  $m/z$  found  $\text{MH}^+$  518.2395,  $\text{C}_{28}\text{H}_{32}\text{N}_5\text{O}_5$  requires 518.2398.

(*S*)-*N*-(2'-(7,7-dimethyl-1-oxo-1,3,4,6,7,8-hexahydro-2*H*-cyclopenta[4,5]pyrrolo[1,2-*a*]pyrazin-2-yl)-3'-(hydroxymethyl)-1-methyl-6-oxo-1,6-dihydro-[3,4'-bipyridin]-5-yl)tetrahydrofuran-2-carboxamide **17**: Yield 35.0%.  $^1\text{H}$  NMR (400 MHz, DMSO- $d_6$ )  $\delta$  9.39 (s, 1H), 8.48 (d,  $J = 5.0$  Hz, 1H), 8.46 (d,  $J = 2.5$  Hz, 1H), 7.76 (d,  $J = 2.5$  Hz, 1H), 7.31 (d,  $J = 5.0$  Hz, 1H), 6.56 (s, 1H), 4.95 (t,  $J = 5.3$  Hz, 1H), 4.47 (dd,  $J = 8.5, 5.6$  Hz, 1H), 4.34 – 4.33 (m, 2H), 4.31 – 4.14 (m, 3H), 4.00 – 3.81 (m, 3H), 3.59 (s, 3H), 2.57 (d,  $J = 7.6$  Hz, 2H), 2.42 (s, 2H), 2.29 – 2.18 (m, 1H), 2.04 –

1.77 (m, 3H), 1.22 (s, 6H). <sup>13</sup>C NMR (101 MHz, DMSO) δ 171.82, 159.23, 156.28, 154.62, 147.93, 147.54, 140.92, 132.46, 130.71, 126.85, 125.74, 125.58, 123.51, 122.36, 115.87, 108.88, 77.97, 69.05, 57.17, 47.79, 45.31, 41.97, 40.72, 38.97, 37.57, 30.16, 30.06, 29.69, 25.09. HRMS (ESI+) m/z found MH<sup>+</sup> 532.2550, C<sub>29</sub>H<sub>34</sub>N<sub>5</sub>O<sub>5</sub> requires 532.2554

*N*-(2'-(7,7-dimethyl-1-oxo-1,3,4,6,7,8-hexahydro-2*H*-cyclopenta[4,5]pyrrolo[1,2-*a*]pyrazin-2-yl)-3'-(hydroxymethyl)-1-methyl-6-oxo-1,6-dihydro-[3,4'-bipyridin]-5-yl)-1-fluorocyclopropane-1-carboxamide **18**: Yield 46.9%. <sup>1</sup>H NMR (400 MHz, DMSO-*d*<sub>6</sub>) δ 9.24 (d, J = 3.9 Hz, 1H), 8.48 (d, J = 5.0 Hz, 1H), 8.42 (d, J = 2.4 Hz, 1H), 7.82 (d, J = 2.4 Hz, 1H), 7.32 (d, J = 5.0 Hz, 1H), 6.55 (s, 1H), 4.94 (t, J = 5.3 Hz, 1H), 4.46 – 4.34 (m, 2H), 4.30 – 4.14 (m, 3H), 3.85 (d, J = 11.1 Hz, 1H), 3.62 (s, 3H), 2.57 (d, J = 7.3 Hz, 2H), 2.43 (s, 2H), 1.56 – 1.45 (m, 2H), 1.39 – 1.31 (m, 2H), 1.22 (s, 6H). HRMS (ESI+) m/z found MH<sup>+</sup> 520.2351, C<sub>28</sub>H<sub>31</sub>FN<sub>5</sub>O<sub>4</sub> requires 520.2360.

(1*S*,2*S*)-*N*-(2'-(7,7-dimethyl-1-oxo-1,3,4,6,7,8-hexahydro-2*H*-cyclopenta[4,5]pyrrolo[1,2-*a*]pyrazin-2-yl)-3'-(hydroxymethyl)-1-methyl-6-oxo-1,6-dihydro-[3,4'-bipyridin]-5-yl)-2-fluorocyclopropane-1-carboxamide **19**: Yield 53.9%. <sup>1</sup>H NMR (400 MHz, DMSO-*d*<sub>6</sub>) δ 9.70 (s, 1H), 8.47 (d, J = 5.0 Hz, 1H), 8.43 (d, J = 2.4 Hz, 1H), 7.74 (d, J = 2.4 Hz, 1H), 7.30 (d, J = 5.1 Hz, 1H), 6.56 (s, 1H), 4.93 (t, J = 5.3 Hz, 2H), 5.01 – 4.72 (m, 1H), 4.48 – 4.36 (m, 2H), 4.25 – 4.14 (m, 3H), 3.85 (d, J = 10.1 Hz, 1H), 3.60 (s, 3H), 2.57 (d, J = 7.2 Hz, 2H), 2.43 (s, 2H), 1.67 – 1.52 (m, 1H), 1.22 (s, 6H), 1.20 – 1.08 (m, 1H). MS (ESI+) m/z found MH<sup>+</sup> found 520.2, C<sub>28</sub>H<sub>31</sub>FN<sub>5</sub>O<sub>4</sub> requires 520.2. Chiral t<sub>R</sub> = 0.579 min (Chiralpak IB-N, isocratic 45% MeOH w/ 0.1% NH<sub>4</sub>OH / CO<sub>2</sub>, 4 mL/min flow, 2.5 min at 40 °C, 120 bar).

(1*R*,2*R*)-*N*-(2'-(7,7-dimethyl-1-oxo-1,3,4,6,7,8-hexahydro-2*H*-cyclopenta[4,5]pyrrolo[1,2-*a*]pyrazin-2-yl)-3'-(hydroxymethyl)-1-methyl-6-oxo-1,6-dihydro-[3,4'-bipyridin]-5-yl)-2-fluorocyclopropane-1-carboxamide **20**: Yield 48.1%. <sup>1</sup>H NMR (400 MHz, DMSO-*d*<sub>6</sub>) δ 9.70 (s, 1H), 8.47 (d, J = 5.1 Hz, 1H), 8.43 (d, J = 2.4 Hz, 1H), 7.74 (d, J = 2.4 Hz, 1H), 7.30 (d, J = 5.0 Hz, 1H), 6.56 (s, 1H), 4.93 (t, J = 5.3 Hz, 2H), 5.04 – 4.71 (m, 1H), 4.45 – 4.36 (m, 2H), 4.25 – 4.15 (m, 3H), 3.85 (d, J = 10.5 Hz, 1H), 3.60 (s, 3H), 2.57 (d, J = 7.2 Hz, 2H), 2.43 (s, 2H), 1.66 – 1.54 (m, 1H), 1.22 (s, 6H), 1.21 – 1.08 (m, 1H). HRMS (ESI+) m/z found MH<sup>+</sup> 520.2348, C<sub>28</sub>H<sub>31</sub>FN<sub>5</sub>O<sub>4</sub> requires 520.2355. Chiral t<sub>R</sub> = 0.704 min (Chiralpak IB-N, isocratic 45% MeOH w/ 0.1% NH<sub>4</sub>OH / CO<sub>2</sub>, 4 mL/min flow, 2.5 min at 40 °C, 120 bar).

*N*-(2'-(7,7-dimethyl-1-oxo-1,3,4,6,7,8-hexahydro-2*H*-cyclopenta[4,5]pyrrolo[1,2-*a*]pyrazin-2-yl)-3'-(hydroxymethyl)-1-methyl-6-oxo-1,6-dihydro-[3,4'-bipyridin]-5-yl)-1-

hydroxycyclopropane-1-carboxamide **30**: Yield 4.1% <sup>1</sup>H NMR (400 MHz, DMSO-*d*<sub>6</sub>) δ 9.76 (s, 1H), 8.49 – 8.45 (m, 2H), 7.75 (d, J = 2.4 Hz, 1H), 7.31 (d, J = 5.1 Hz, 1H), 6.86 (s, 1H), 6.55 (s, 1H), 4.94 – 4.89 (m, 1H), 4.45 – 4.36 (m, 2H), 4.22 - 4.15 (m, 2H), 3.89 - 3.82 (m, 1H), 3.61 (s, 3H), 2.57 (d, J = 7.2 Hz, 1H), 2.43 (s, 2H), 1.24 (s, 1H), 1.22 (s, 6H), 1.16 (q, J = 3.9, 3.5 Hz, 2H), 1.02 (d, J = 3.4 Hz, 2H), 0.95 (d, J = 6.5 Hz, 1H). MS (ESI+) m/z found MH<sup>+</sup> 518.2, C<sub>28</sub>H<sub>32</sub>N<sub>5</sub>O<sub>5</sub> requires 518.2.

*N*-(2'-(7,7-dimethyl-1-oxo-1,3,4,6,7,8-hexahydro-2*H*-cyclopenta[4,5]pyrrolo[1,2-*a*]pyrazin-2-yl)-3'-(hydroxymethyl)-1-methyl-6-oxo-1,6-dihydro-[3,4'-bipyridin]-5-yl)-2-morpholinoacetamide **31**: Yield 32.2%. <sup>1</sup>H NMR (400 MHz, DMSO-*d*<sub>6</sub>) δ 9.96 (s, 1H), 8.48 (d, J = 5.0 Hz, 1H), 8.45 (d, J = 2.4 Hz, 1H), 7.74 (d, J = 2.4 Hz, 1H), 7.30 (d, J = 5.1 Hz, 1H), 6.55 (s, 1H), 4.93 (br s, 1H), 4.46 – 4.34 (m, 2H), 4.28 – 4.15 (m, 3H), 3.89 – 3.81 (m, 1H), 3.69 – 3.63 (m, 4H), 3.60 (s, 3H), 3.27 (s, 2H), 3.17 (s, 2H), 2.61 – 2.52 (m, 6H), 1.22 (s, 6H). HRMS (ESI+) m/z found MH<sup>+</sup> 561.2817, C<sub>30</sub>H<sub>37</sub>N<sub>6</sub>O<sub>5</sub> requires 561.2820.

*N*-(2'-(7,7-dimethyl-1-oxo-1,3,4,6,7,8-hexahydro-2*H*-cyclopenta[4,5]pyrrolo[1,2-*a*]pyrazin-2-yl)-3'-(hydroxymethyl)-1-methyl-6-oxo-1,6-dihydro-[3,4'-bipyridin]-5-yl)nicotinamide **32**: Yield 37.7%. <sup>1</sup>H NMR (400 MHz, DMSO-*d*<sub>6</sub>) δ 9.72 (s, 1H), 9.08 (dd, J = 2.4, 0.9 Hz, 1H), 8.77 (dd, J = 4.8, 1.6 Hz, 1H), 8.52 – 8.49 (m, 2H), 8.31 – 8.26 (m, 1H), 7.86 (d, J = 2.4 Hz, 1H), 7.60 – 7.55 (m, 1H), 7.36 (d, J = 5.1 Hz, 1H), 6.56 (s, 1H), 4.99 (br s, 1H), 4.51 – 4.37 (m, 2H), 4.31 – 4.16 (m, 3H), 3.91 – 3.83 (m, 1H), 3.63 (s, 3H), 2.58 (d, J = 7.4 Hz, 2H), 2.43 (s, 2H), 1.22 (s, 6H). HRMS (ESI+) m/z found MH<sup>+</sup> 539.2399, C<sub>30</sub>H<sub>31</sub>N<sub>6</sub>O<sub>4</sub> requires 539.2401.

The following compounds were prepared using the procedure described for **9** and replacing acetic acid with the appropriate carboxylic acids and substituting intermediate **7** with 2-(5-amino-3'-(hydroxymethyl)-1-methyl-6-oxo-1,6-dihydro-[3,4'-bipyridin]-2'-yl)-6-(*tert*-butyl)-8-fluorophthalazin-1(2*H*)-one **S15**.

*N*-(2'-(6-(*tert*-butyl)-8-fluoro-1-oxophthalazin-2(1*H*)-yl)-3'-(hydroxymethyl)-1-methyl-6-oxo-1,6-dihydro-[3,4'-bipyridin]-5-yl)cyclopropanecarboxamide **23**: Yield 69.1%. <sup>1</sup>H NMR (400 MHz, DMSO-*d*<sub>6</sub>) δ 9.70 (s, 1H), 8.55 (d, J = 5.0 Hz, 1H), 8.52 (d, J = 2.5 Hz, 1H), 8.38 (d, J = 2.4 Hz, 1H), 7.89 (d, J = 1.8 Hz, 1H), 7.80 – 7.71 (m, 2H), 7.47 (d, J = 5.0 Hz, 1H), 4.89 (t, J = 5.0 Hz, 1H), 4.43 – 4.35 (m, 2H), 3.60 (s, 3H), 2.31 – 2.20 (m, 1H), 1.39 (s, 9H), 0.85 – 0.72 (m, 4H). MS (ESI+) m/z found MH<sup>+</sup> 518.2, C<sub>28</sub>H<sub>29</sub>FN<sub>5</sub>O<sub>4</sub> requires 518.2.

(1*R*,2*R*)-*N*-(2'-(6-(*tert*-butyl)-8-fluoro-1-oxophthalazin-2(*1H*)-yl)-3'-(hydroxymethyl)-1-methyl-6-oxo-1,6-dihydro-[3,4'-bipyridin]-5-yl)-2-fluorocyclopropane-1-carboxamide **24**: Yield 64.4%. <sup>1</sup>H NMR (400 MHz, DMSO-*d*<sub>6</sub>) δ 9.72 (s, 1H), 8.56 (d, *J* = 5.0 Hz, 1H), 8.52 (d, *J* = 2.6 Hz, 1H), 8.40 (d, *J* = 2.4 Hz, 1H), 7.89 (d, *J* = 1.8 Hz, 1H), 7.80 – 7.72 (m, 2H), 7.48 (d, *J* = 5.0 Hz, 1H), 5.01 – 4.78 (m, 2H), 4.43 – 4.36 (m, 2H), 3.60 (s, 3H), 2.49 – 2.42 (m, 1H), 1.66 – 1.53 (m, 1H), 1.39 (s, 9H), 1.20 – 1.09 (m, 1H). HRMS (ESI+) *m/z* found MH<sup>+</sup> 536.2097, C<sub>28</sub>H<sub>28</sub>F<sub>2</sub>N<sub>5</sub>O<sub>4</sub> requires 536.2104. Chiral *t*<sub>R</sub> = 1.403 min (Chiralpak IB-N, isocratic 45% MeOH w/ 0.1% NH<sub>4</sub>OH / CO<sub>2</sub>, 4 mL/min flow, 2.5 min at 40 °C, 120 bar).

(1*R*,2*S*)-*N*-(2'-(6-(*tert*-butyl)-8-fluoro-1-oxophthalazin-2(*1H*)-yl)-3'-(hydroxymethyl)-1-methyl-6-oxo-1,6-dihydro-[3,4'-bipyridin]-5-yl)-2-fluorocyclopropane-1-carboxamide **26**: Yield 35.6%. <sup>1</sup>H NMR (400 MHz, DMSO-*d*<sub>6</sub>) δ 10.02 (s, 1H), 8.55 (d, *J* = 5.1 Hz, 1H), 8.52 (d, *J* = 2.6 Hz, 1H), 8.35 (d, *J* = 2.4 Hz, 1H), 7.89 (d, *J* = 1.7 Hz, 1H), 7.79 – 7.74 (m, 2H), 7.47 (d, *J* = 5.0 Hz, 1H), 4.96 – 4.73 (m, 2H), 4.44 – 4.33 (m, 2H), 3.60 (s, 3H), 2.98 – 2.85 (m, 1H), 1.56 – 1.40 (m, 1H), 1.39 (s, 9H), 1.25 – 1.14 (m, 1H). <sup>13</sup>C NMR (101 MHz, DMSO) δ 169.63, 161.77, 160.05 (d), 159.16, 156.36, 155.60 (d), 153.77, 148.15, 148.01, 137.70, 132.75, 131.98, 131.11, 127.91, 125.31, 124.11, 119.71, 117.02, 116.82, 114.83, 113.85 (d), 74.97, 72.75, 56.38, 37.62, 30.49, 20.94 (d), 18.45 (d). HRMS (ESI+) *m/z* found MH<sup>+</sup> 536.2102, C<sub>28</sub>H<sub>28</sub>F<sub>2</sub>N<sub>5</sub>O<sub>4</sub> requires 536.2104. Chiral *t*<sub>R</sub> = 0.586 min (Chiralpak AD, isocratic 40% IPA w/ 0.1% NH<sub>4</sub>OH / CO<sub>2</sub>, 4 mL/min flow, 2.5 min at 40 °C, 120 bar).

(1*S*,2*R*)-*N*-(2'-(6-(*tert*-butyl)-8-fluoro-1-oxophthalazin-2(*1H*)-yl)-3'-(hydroxymethyl)-1-methyl-6-oxo-1,6-dihydro-[3,4'-bipyridin]-5-yl)-2-fluorocyclopropane-1-carboxamide **27**: Yield 33.6%. <sup>1</sup>H NMR (400 MHz, DMSO-*d*<sub>6</sub>) δ 10.02 (s, 1H), 8.55 (d, *J* = 5.0 Hz, 1H), 8.52 (d, *J* = 2.5 Hz, 1H), 8.35 (d, *J* = 2.5 Hz, 1H), 7.89 (d, *J* = 1.9 Hz, 1H), 7.79 – 7.74 (m, 2H), 7.47 (d, *J* = 5.0 Hz, 1H), 4.94 – 4.74 (m, 2H), 4.38 (t, *J* = 5.2 Hz, 2H), 3.60 (s, 3H), 2.98 – 2.85 (m, 1H), 1.56 – 1.40 (m, 1H), 1.39 (s, 9H), 1.25 – 1.14 (m, 1H). <sup>13</sup>C NMR (101 MHz, DMSO) δ 169.62, 161.77, 160.05 (d), 159.16, 156.36, 155.60 (d), 153.77, 148.15, 148.01, 137.70, 132.75, 131.97, 131.11, 127.89, 125.31, 124.11, 119.71, 117.02, 116.81, 114.83, 113.85 (d), 74.97, 72.75, 56.38, 37.62, 30.49, 20.94 (d), 18.45 (d). HRMS (ESI+) *m/z* found MH<sup>+</sup> 536.2103; C<sub>28</sub>H<sub>28</sub>F<sub>2</sub>N<sub>5</sub>O<sub>4</sub> requires 536.2104. Chiral *t*<sub>R</sub> = 0.685 min (Chiralpak AD, isocratic 40% IPA w/ 0.1% NH<sub>4</sub>OH / CO<sub>2</sub>, 4 mL/min flow, 2.5 min at 40 °C, 120 bar).

Scheme S4. Preparation of **8** and **13**.<sup>a</sup>

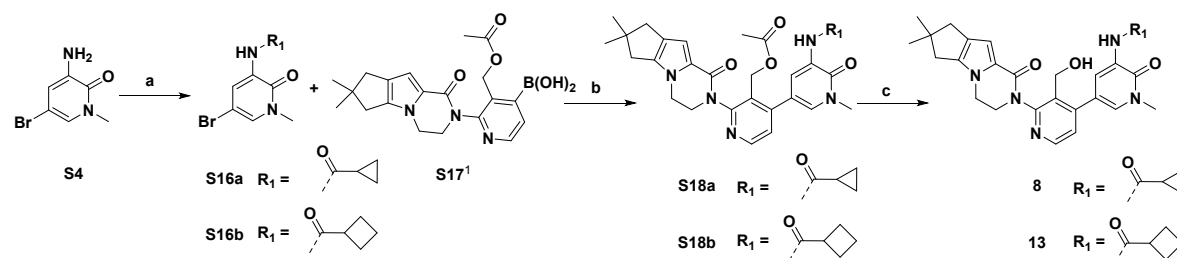

<sup>a</sup> Reagents and conditions: (a) Cyclopropanecarboxylic acid or cyclobutanecarboxylic acid, HATU, DIPEA, DCM, 60 °C, 56 – 72% yield; (b) Pd(dppf)Cl<sub>2</sub>, NaOAc, K<sub>3</sub>PO<sub>4</sub>·3H<sub>2</sub>O, ACN, H<sub>2</sub>O, 100 °C, 33 – 56% yield; (c) LiOH, <sup>i</sup>PrOH/THF/H<sub>2</sub>O, 40 °C, 47 – 65% yield.

*N*-(2'-(7,7-dimethyl-1-oxo-1,3,4,6,7,8-hexahydro-2*H*-cyclopenta[4,5]pyrrolo[1,2-*a*]pyrazin-2-yl)-3'-(hydroxymethyl)-1-methyl-6-oxo-1,6-dihydro-[3,4'-bipyridin]-5-yl)cyclopropanecarboxamide **8**

Step 1: *N*-(5-bromo-1-methyl-2-oxo-1,2-dihydropyridin-3-yl)cyclopropanecarboxamide **S16a**

To a mixture of cyclopropanecarboxylic acid (180 mg, 2.0 mmol), HATU (570 mg, 1.5 mmol) and DIPEA (390 mg, 3.0 mmol) in DCM (8 mL) was added 3-amino-5-bromo-1-methylpyridin-2(1*H*)-one **S4** (230 mg, 1.12 mmol). The reaction mixture was stirred at 25 °C for 5h. The resulting mixture was evaporated under reduced pressure. The resulting residue was purified by flash column chromatography (SiO<sub>2</sub>: MeOH / DCM) to afford 220 mg of **S16a**. Yield 72%. MS [ESI<sup>+</sup>] (m/z calcd for C<sub>10</sub>H<sub>12</sub>BrN<sub>2</sub>O<sub>2</sub> [M + H]<sup>+</sup>, 270.0; found, 270.

Step 2: [4-(5-cyclopropaneamido-1-methyl-6-oxo-1,6-dihydropyridin-3-yl)-2-{4,4-dimethyl-9-oxo-1,10-diazatricyclo[6.4.0.0<sup>2,6</sup>]dodeca-2(6),7-dien-10-yl}pyridin-3-yl]methyl acetate **S18a**

A 50-mL round-bottomed flask equipped with a magnetic stirrer and a reflux condenser was charged with **S16a** (220 mg, 0.80 mmol), {3-[(acetyloxy)methyl]-2-{4,4-dimethyl-9-oxo-1,10-diazatricyclo[6.4.0.0<sup>2,6</sup>]dodeca-2(6),7-dien-10-yl}pyridin-4-yl}boronic acid **S17<sup>1</sup>** (320 mg, 0.80 mmol), Pd(dppf)Cl<sub>2</sub> (42 mg, 0.05 mmol), NaOAc (82 mg, 1.0 mmol), K<sub>3</sub>PO<sub>4</sub>·3H<sub>2</sub>O (266 mg, 1.0 mmol), water (6 drops), and ACN (6 mL). After three cycles of vacuum/argon purge, the mixture was heated at 100 °C for 1h. The reaction mixture was filtered, and the filtrate was evaporated under reduced pressure. The residue was purified by flash column chromatography (SiO<sub>2</sub>: MeOH

/ DCM) to afford 150 mg of **S18a** as a solid. Yield 33%. MS [ES-MS] (ESI+): m/z calcd for C<sub>30</sub>H<sub>34</sub>N<sub>5</sub>O<sub>5</sub> [M + H]<sup>+</sup> 544.3; found, 544.3.

### Step 3: Preparation of **8**

A mixture of **S18a** (150 mg, 0.27 mmol) and lithium hydroxide (34 mg, 1.4 mmol) in <sup>i</sup>PrOH / THF (1:1, 4 mL) and H<sub>2</sub>O (1 mL) was stirred at 40 °C for 0.5h. The mixture was evaporated under reduced pressure and the residue was partitioned between ethyl acetate and water. The organic layer was concentrated under reduced pressure and the residue was purified by reverse-phase prep-HPLC to afford 65 mg of the title compound **8** as a pale yellow solid. Yield 65%. <sup>1</sup>H NMR (400 MHz, DMSO-*d*<sub>6</sub>) δ 9.69 (s, 1H), 8.46 (d, J = 5.0 Hz, 1H), 8.41 (d, J = 2.2 Hz, 1H), 7.73 (d, J = 2.4 Hz, 1H), 7.29 (d, J = 5.0 Hz, 1H), 6.55 (s, 1H), 4.97 – 4.89 (m, 1H), 4.48 – 4.32 (m, 2H), 4.29 – 4.13 (m, 3H), 3.89 – 3.79 (m, 1H), 3.59 (s, 3H), 2.57 (d, J = 7.4 Hz, 2H), 2.42 (s, 2H), 2.30 – 2.20 (m, 1H), 1.22 (s, 6H), 0.82 – 0.72 (m, 4H). <sup>13</sup>C NMR (101 MHz, DMSO) δ 172.87, 159.20, 156.40, 154.64, 147.86, 147.71, 140.89, 132.05, 130.63, 128.13, 125.77, 125.57, 123.70, 123.44, 115.64, 108.85, 57.21, 47.79, 45.30, 41.96, 40.72, 37.60, 30.16, 30.06, 14.18, 7.67. HRMS (ESI+) m/z found MH<sup>+</sup> 502.2447, C<sub>28</sub>H<sub>32</sub>N<sub>5</sub>O<sub>4</sub> requires 502.2449.

*N*-(2'-(7,7-dimethyl-1-oxo-1,3,4,6,7,8-hexahydro-2*H*-cyclopenta[4,5]pyrrolo[1,2-*a*]pyrazin-2-yl)-3'-(hydroxymethyl)-1-methyl-6-oxo-1,6-dihydro-[3,4'-bipyridin]-5-yl)cyclobutanecarboxamide **13**:

Compound **13** was prepared in a similar manner to **8**, replacing cyclopropanecarboxylic acid with cyclobutanecarboxylic acid. Yield 14.7% over three steps. <sup>1</sup>H NMR (400 MHz, DMSO-*d*<sub>6</sub>) δ 9.08 (s, 1H), 8.50 – 8.45 (m, 2H), 7.73 (d, J = 2.5 Hz, 1H), 7.31 (d, J = 5.0 Hz, 1H), 6.56 (s, 1H), 4.95 (t, J = 5.3 Hz, 1H), 4.47 – 4.34 (m, 2H), 4.31 – 4.14 (m, 3H), 3.90 – 3.81 (m, 1H), 3.57 (s, 3H), 3.57 – 3.46 (m, 1H), 2.57 (d, J = 7.4 Hz, 2H), 2.43 (s, 2H), 2.25 – 2.04 (m, 4H), 1.98 – 1.85 (m, 1H), 1.85 – 1.73 (m, 1H), 1.22 (s, 6H). <sup>13</sup>C NMR (101 MHz, DMSO) δ 173.96, 159.21, 156.41, 154.65, 147.88, 147.71, 140.90, 132.04, 130.64, 127.99, 125.77, 125.57, 123.47, 123.36, 115.71, 108.86, 57.22, 47.80, 45.31, 41.97, 40.72, 39.24, 38.97, 37.58, 30.16, 30.06, 24.61, 17.61. HRMS (ESI+) m/z found MH<sup>+</sup> 516.2604, C<sub>29</sub>H<sub>34</sub>N<sub>5</sub>O<sub>4</sub> requires 516.2605.

Scheme S5. Preparation of **16**.<sup>a</sup>

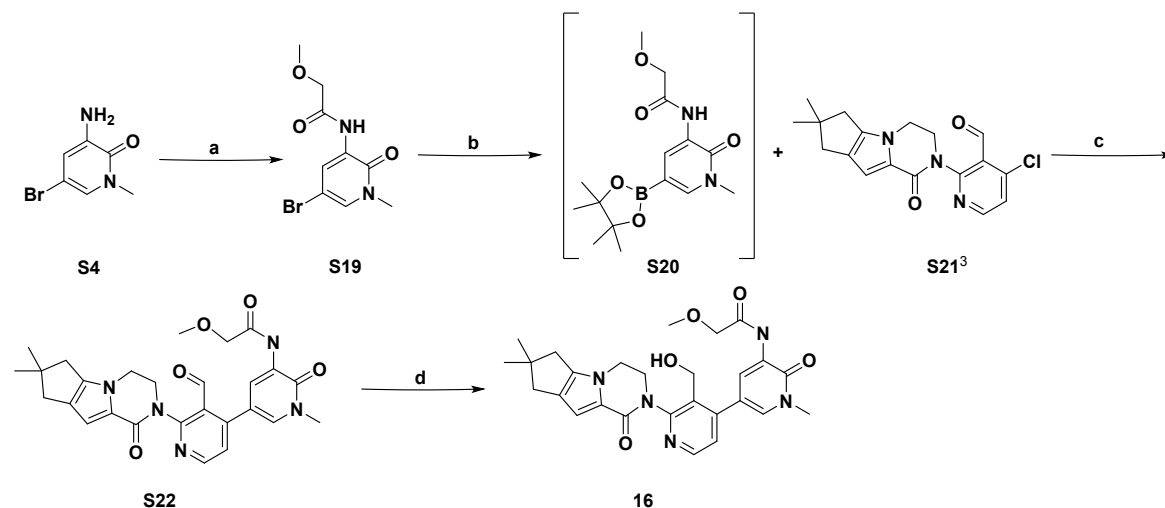

<sup>a</sup>Reagents and conditions: (a) HATU, DIPEA, DMF, 60 °C, 78.4% yield; (b) Pin<sub>2</sub>B<sub>2</sub>, KOAc, XPhos, Pd<sub>2</sub>(dba)<sub>3</sub>, dioxane, microwave, 100 °C, 30 min.; (c) K<sub>3</sub>PO<sub>4</sub>·3H<sub>2</sub>O, 80 °C, microwave, 1 h, 62.5% yield over 2 steps; (d) NaBH<sub>4</sub>, MeOH, 77.2% yield.

*N*-(2'-(7,7-dimethyl-1-oxo-1,3,4,6,7,8-hexahydro-2*H*-cyclopenta[4,5]pyrrolo[1,2-*a*]pyrazin-2-yl)-3'-(hydroxymethyl)-1-methyl-6-oxo-1,6-dihydro-[3,4'-bipyridin]-5-yl)-2-methoxyacetamide **16**

Step 1: *N*-(5-bromo-1-methyl-2-oxo-1,2-dihydropyridin-3-yl)-2-methoxyacetamide **S19**

A mixture of 3-amino-5-bromo-1-methylpyridin-2(1*H*)-one **S4** (1014 mg, 4.99 mmol), 2-methoxyacetic acid (540 mg, 5.99 mmol, 1.2 equiv.), HATU (3230 mg, 8.49 mmol, 1.7 equiv.) and DIPEA (2.6 mL, 1936 mg, 15.0 mmol, 3 equiv.) in DMF (10 mL) was stirred at 60 °C for 16h. The resulting mixture was diluted with water and then extracted with 1:1 v/v ethyl acetate/ether (3x). The combined organic layers were washed with brine, dried over Na<sub>2</sub>SO<sub>4</sub>, filtered, and concentrated under reduced pressure. The resulting residue was purified by flash column chromatography (SiO<sub>2</sub>: ethyl acetate / heptane) to afford 1077 mg of **S19**. Yield 78%. MS [ESI-MS] (ESI+): *m/z* calcd for C<sub>9</sub>H<sub>12</sub>BrN<sub>2</sub>O<sub>3</sub> [M + H]<sup>+</sup>, 274.9; found, 274.9.

Step 2: Preparation of **16**

Compound **16** was prepared in a similar manner to **25**, using *N*-(5-bromo-1-methyl-2-oxo-1,2-dihydropyridin-3-yl)-2-methoxyacetamide **S19** and 4-chloro-2-(7,7-dimethyl-1-oxo-1,3,4,6,7,8-hexahydro-2*H*-cyclopenta[4,5]pyrrolo[1,2-*a*]pyrazin-2-yl)nicotinaldehyde **S21**<sup>3</sup> as starting materials. Yield 37.8%. <sup>1</sup>H NMR (400 MHz, DMSO-*d*<sub>6</sub>) δ 9.26 (s, 1H), 8.50 – 8.46 (m, 2H), 7.77

(d,  $J = 2.5$  Hz, 1H), 7.31 (d,  $J = 5.1$  Hz, 1H), 6.56 (s, 1H), 4.97 – 4.92 (m, 1H), 4.46 – 4.33 (m, 2H), 4.29 – 4.16 (m, 3H), 4.06 (s, 2H), 3.90 – 3.80 (m, 1H), 3.60 (s, 3H), 3.43 (s, 3H), 2.57 (d,  $J = 7.8$  Hz, 2H), 2.42 (s, 2H), 1.22 (s, 6H).  $^{13}\text{C}$  NMR (101 MHz, DMSO)  $\delta$  168.34, 159.22, 156.24, 154.64, 147.94, 147.53, 140.91, 132.49, 130.71, 126.86, 125.74, 125.58, 123.51, 122.56, 115.86, 108.87, 71.50, 58.81, 57.15, 47.78, 45.30, 41.96, 40.71, 38.96, 37.56, 30.16, 30.04. HRMS (ESI+)  $m/z$  found  $\text{MH}^+$  506.2396,  $\text{C}_{27}\text{H}_{32}\text{N}_5\text{O}_5$  requires 506.2398.

Scheme S6. Preparation of **33** and **34**.<sup>a</sup>

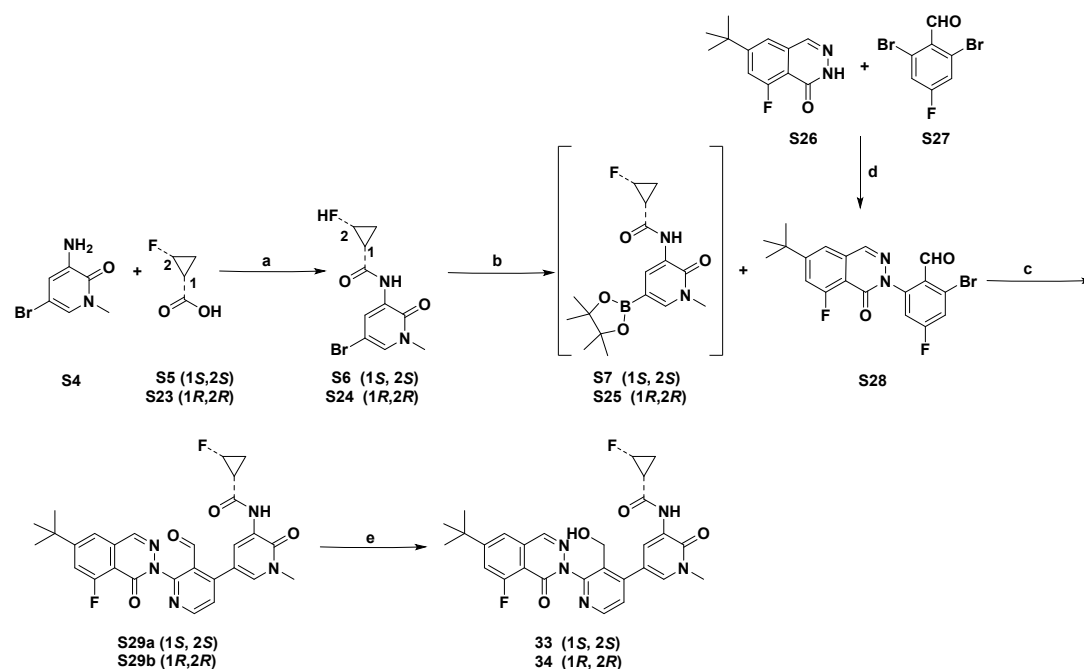

<sup>a</sup>Reagents and conditions: (a) HATU, DIPEA, DCM, 60 °C, 54 – 74.4% yield; (b)  $\text{Pin}_2\text{B}_2$ , KOAc, XPhos,  $\text{Pd}_2(\text{dba})_3$ , dioxane, microwave, 100°C, 30 min (c)  $\text{K}_3\text{PO}_4 \cdot 3\text{H}_2\text{O}$ , 80 °C, microwave, 1 h, 17.6 – 25.1% yield over 2 steps; (d) XantPhos,  $\text{Cs}_2\text{CO}_3$ ,  $\text{Pd}_2(\text{dba})_3$ , 1,4-dioxane, 90 °C, 19h, 24.8% yield; (e)  $\text{NaBH}_4$ , MeOH, 63.2 – 69.8% yield.

(1*S*,2*S*)-*N*-(2'-(6-(*tert*-butyl)-8-fluoro-1-oxophthalazin-2(*1H*)-yl)-3'-(hydroxymethyl)-1-methyl-6-oxo-1,6-dihydro-[3,4'-bipyridin]-5-yl)-2-fluorocyclopropane-1-carboxamide **33**

Step 1: Preparation of 2-bromo-6-(6-(*tert*-butyl)-8-fluoro-1-oxophthalazin-2(*1H*)-yl)-4-fluorobenzaldehyde **S28**.

In a 5-mL vial was placed 6-*tert*-butyl-8-fluoro-2*H*-phthalazin-1-one **S26** (331 mg, 1.50 mmol), 2,6-dibromo-4-fluoro-benzaldehyde **S27** (508 mg, 1.80 mmol, 1.2 equiv.), cesium carbonate (867 mg, 4.51 mmol, 3.0 equiv.), Xantphos (174 mg, 0.3006 mmol, 0.2 equiv.),  $\text{Pd}_2(\text{dba})_3$  (69 mg, 0.08



mmol, 0.05 equiv.), and dioxane (10.7 mL), and the reaction mixture was degassed for 15 min. The vial was vacuum purged / filled with N<sub>2</sub> (3x) and capped. The reaction mixture was stirred at 90 °C for 19h. The reaction was quenched with ethyl acetate / water and filtered. The organic phase from the filtrate was washed with water and brine, dried over Na<sub>2</sub>SO<sub>4</sub>, filtered, and concentrated under reduced pressure. The crude residue was purified by flash column chromatography (SiO<sub>2</sub>: Ethyl acetate / heptane) to afford 157 mg of **S28** as a solid. Yield 24.8%. <sup>1</sup>H NMR (400 MHz, Chloroform-*d*) δ 10.20 (d, J = 0.9 Hz, 1H), 8.19 (d, J = 2.5 Hz, 1H), 7.52 – 7.49 (m, 2H), 7.48 (dd, J = 4.4, 2.1 Hz, 1H), 7.27 - 7.23 (m, 1H), 1.41 (s, 9H). MS (ESI+) m/z found MH<sup>+</sup> 421.1, C<sub>19</sub>H<sub>16</sub>BrF<sub>2</sub>N<sub>2</sub>O<sub>2</sub> requires 421.1.

#### Step 2: Preparation of **33**

Following the procedures described for **25**, replacing 2-(6-*tert*-butyl-8-fluoro-1-oxophthalazin-2-yl)-4-chloro-pyridine-3-carbaldehyde **S8** with 2-bromo-6-(6-(*tert*-butyl)-8-fluoro-1-oxophthalazin-2(*1H*)-yl)-4-fluorobenzaldehyde **S28**, the title compound **33** was prepared. Yield 17.5%. <sup>1</sup>H NMR (400 MHz, DMSO-*d*<sub>6</sub>) δ 9.70 (s, 1H), 8.51 (d, J = 2.5 Hz, 1H), 8.34 (d, J = 2.4 Hz, 1H), 7.88 (d, J = 1.8 Hz, 1H), 7.75 (dd, J = 13.3, 1.7 Hz, 1H), 7.65 (d, J = 2.4 Hz, 1H), 7.38 (dd, J = 9.0, 2.8 Hz, 1H), 7.28 (dd, J = 9.3, 2.8 Hz, 1H), 5.00 – 4.78 (m, 1H), 4.66 (t, J = 5.2 Hz, 1H), 4.30 (d, J = 5.3 Hz, 2H), 3.58 (s, 3H), 2.48 – 2.42 (m, 1H), 1.66 – 1.53 (m, 1H), 1.38 (s, 9H), 1.20 – 1.09 (m, 1H). <sup>13</sup>C NMR (101 MHz, DMSO) δ 166.18 (d), 161.74, 159.86 (d), 159.31, 159.12, 156.23, 155.63 (d), 143.28 (d), 140.78 (d), 137.85, 132.86 (d), 131.96, 127.85, 124.28, 119.57 (d), 116.90 (d), 116.68, 116.42, 115.34, 115.12, 113.98 (d), 73.64, 71.38, 56.49, 37.49, 35.54, 30.48, 21.38 (d), 10.75 (d). HRMS (ESI+) m/z found MH<sup>+</sup> 553.2050, C<sub>29</sub>H<sub>28</sub>F<sub>3</sub>N<sub>4</sub>O<sub>4</sub> requires 553.2057. Chiral t<sub>R</sub> = 0.743 min (Chiralcel OX, isocratic 50% MeOH w/ 0.1% NH<sub>4</sub>OH / CO<sub>2</sub>, 4 mL/min flow, 2.5 min at 40 °C, 120 bar).

(1*R*,2*R*)-*N*-(2'-(6-(*tert*-butyl)-8-fluoro-1-oxophthalazin-2(*1H*)-yl)-3'-(hydroxymethyl)-1-methyl-6-oxo-1,6-dihydro-[3,4'-bipyridin]-5-yl)-2-fluorocyclopropane-1-carboxamide **34**

Step 1: Preparation of (1*R*,2*R*)-*N*-(5-bromo-1-methyl-2-oxo-1,2-dihydropyridin-3-yl)-2-fluorocyclopropane-1-carboxamide **S24**

Following a similar procedure described for **S6** as previously described, replacing (1*S*,2*S*)-2-fluorocyclopropanecarboxylic acid **S5** with (1*R*,2*R*)-2-fluorocyclopropanecarboxylic acid **S23**, (1*R*,2*R*)-*N*-(5-bromo-1-methyl-2-oxo-1,2-dihydropyridin-3-yl)-2-fluorocyclopropane-1-carboxamide **S24** was prepared. Yield 74%. <sup>1</sup>H NMR (400 MHz, CDCl<sub>3</sub>) δ 8.61 (br s, 1H), 8.51

(d,  $J = 2.5$  Hz, 1H), 7.13 (d,  $J = 2.6$  Hz, 1H), 4.89 – 4.67 (m, 1H), 3.59 (s, 3H), 1.95 – 1.83 (m, 2H), 1.27 – 1.18 (m, 1H). MS (ESI+)  $m/z$  found  $MH^+$  289,  $C_{10}H_{11}BrFN_2O_2$  requires 288.99.

#### Step 2: Preparation of **34**

Following the procedures described for **33**, replacing (1*S*,2*S*)-*N*-(5-bromo-1-methyl-2-oxo-1,2-dihydropyridin-3-yl)-2-fluorocyclopropane-1-carboxamide **S6** with (1*R*,2*R*)-*N*-(5-bromo-1-methyl-2-oxo-1,2-dihydropyridin-3-yl)-2-fluorocyclopropane-1-carboxamide **S24**, the title compound **34** was prepared. Yield 11.1%.  $^1H$  NMR (400 MHz,  $DMSO-d_6$ )  $\delta$  9.70 (s, 1H), 8.51 (d,  $J = 2.5$  Hz, 1H), 8.34 (d,  $J = 2.4$  Hz, 1H), 7.88 (d,  $J = 1.7$  Hz, 1H), 7.75 (dd,  $J = 13.2, 1.7$  Hz, 1H), 7.65 (d,  $J = 2.4$  Hz, 1H), 7.38 (dd,  $J = 9.0, 2.8$  Hz, 1H), 7.28 (dd,  $J = 9.3, 2.8$  Hz, 1H), 5.00 – 4.78 (m, 1H), 4.66 (t,  $J = 5.2$  Hz, 1H), 4.30 (d,  $J = 5.2$  Hz, 2H), 3.58 (s, 3H), 2.52 – 2.42 (m, 1H), 1.66 – 1.53 (m, 1H), 1.38 (s, 9H), 1.20 – 1.09 (m, 1H). HRMS (ESI+)  $m/z$  found  $MH^+$  553.2051.  $C_{29}H_{28}F_3N_4O_4$  requires 553.2057. Chiral  $t_R = 1.053$  min (Chiralcel OX, isocratic 50% MeOH w/ 0.1%  $NH_4OH$  /  $CO_2$ , 4 mL/min flow, 2.5 min at 40 °C, 120 bar).

#### Scheme S7. Preparation of **22**.<sup>a</sup>

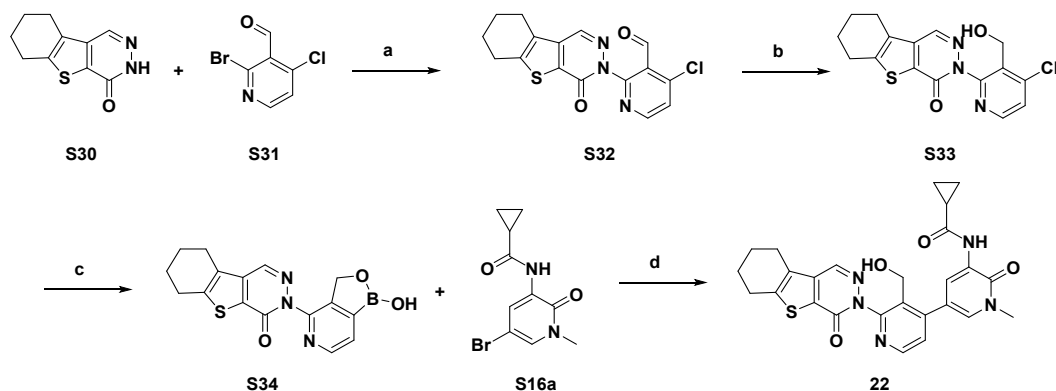

<sup>a</sup>Reagents: (a)  $CuI$ , sarcosine,  $K_2CO_3$ , dioxane, 80 °C, 16h, 60% yield; (b)  $NaBH_4$ , MeOH, DMA, dioxane, 10 °C, 1h, 59% yield; (c)  $B_2(OH)_4$ , XPhos-Pd-G2, XPhos, KOAc, EtOH, 80 °C, 1h, 56% yield; (d)  $Pd(dppf)Cl_2$ ,  $Na_2CO_3$ , LiCl, dioxane /  $H_2O$  (10 mL, 3/1, v/v) 50 °C, 2 h, 10.5% yield.

*N*-(3'-(hydroxymethyl)-1-methyl-6-oxo-2'-(4-oxo-6,7,8,9-tetrahydrobenzo[4,5]thieno[2,3-*d*]pyridazin-3(4*H*)-yl)-1,6-dihydro-[3,4'-bipyridin]-5-yl)cyclopropanecarboxamide **22**

Step 1: 4-chloro-2-(4-oxo-6,7,8,9-tetrahydrobenzo[4,5]thieno[2,3-*d*]pyridazin-3(4*H*)-yl)nicotinaldehyde **S32**

A mixture of 6,7,8,9-tetrahydrobenzo[4,5]thieno[2,3-*d*]pyridazin-4(3*H*)-one (500 mg, 2.42 mmol), 2-bromo-4-chloronicotinaldehyde (1.59 g, 7.26 mmol) and  $K_2CO_3$  (1.0 g, 7.26 mmol) in

1,4-dioxane (50 mL) was treated with CuI (462 mg, 2.42 mmol) and sarcosine (237 mg, 2.66 mmol), and the reaction mixture was stirred at 110 °C for 16 h. The reaction mixture was filtered and the filtrate was concentrated. The residue was purified by flash column chromatography (SiO<sub>2</sub>: ethyl acetate / DCM) to afford 0.5 g of **S32** as a solid. Yield 60%.

Step 2: 3-(4-chloro-3-(hydroxymethyl)pyridin-2-yl)-6,7,8,9-tetrahydrobenzo[4,5]thieno[2,3-*d*]pyridazin-4(3*H*)-one **S33**

To a mixture of 4-chloro-2-(4-oxo-6,7,8,9-tetrahydrobenzo[4,5]thieno[2,3-*d*]pyridazin-3(4*H*)-yl)nicotinaldehyde (500 mg, 1.45 mmol) in 1,4-dioxane (10 mL) were added NaBH<sub>4</sub> (27 mg, 0.725 mmol) in DMA (252 mg, 2.9 mmol) and MeOH (139 mg, 4.35 mmol) in one portion at 10 °C. The reaction mixture was stirred at 10 °C for 1h, quenched with ice-water (10 mL), and stirred for 20 min. Volatile solvent was concentrated under reduced pressure at 50 °C, and the mixture was extracted with ethyl acetate (50 mL×3). The combined organic layers were washed with brine (20 mL×2), dried over Na<sub>2</sub>SO<sub>4</sub>, and concentrated under reduced pressure. The residue was purified by flash column chromatography (SiO<sub>2</sub>: Ethyl acetate / petroleum ether) to afford 300 mg of **S33** as a solid. Yield 59%.

Step 3: 3-(1-hydroxy-1,3-dihydro-[1,2]oxaborolo[4,3-*c*]pyridin-4-yl)-6,7,8,9-tetrahydrobenzo[4,5]thieno[2,3-*d*]pyridazin-4(3*H*)-one **S34**

A mixture of 3-(4-chloro-3-(hydroxymethyl)pyridin-2-yl)-6,7,8,9-tetrahydrobenzo[4,5]thieno[2,3-*d*]pyridazin-4(3*H*)-one (360 mg, 1.04 mmol) and tetrahydroxydiborane (281 mg, 3.12 mmol) in EtOH (10 mL) was treated with Xphos-Pd-G2 (78 mg, 0.1 mol) and Xphos (95 mg, 0.2 mmol). The resulting mixture was heated to 80 °C for 1h under nitrogen. The mixture was quenched with water (20 mL) and extracted with ethyl acetate (20 mL×3). The combined organic layers were dried over Na<sub>2</sub>SO<sub>4</sub> and concentrated under reduced pressure. The residue was triturated with toluene (3 mL) to afford 200 mg of **S34** as a brown solid. Yield 56%.

Step 4: Preparation of **22**

A mixture of 3-(1-hydroxy-1,3-dihydro-[1,2]oxaborolo[4,3-*c*]pyridin-4-yl)-6,7,8,9-tetrahydrobenzo[4,5]thieno[2,3-*d*]pyridazin-4(3*H*)-one **S34** (136 mg, 0.5 mmol), *N*-(5-bromo-1-methyl-2-oxo-1,2-dihydropyridin-3-yl)cyclopropanecarboxamide **S16a** (170 mg 0.5 mmol), Pd(dppf)Cl<sub>2</sub> (24 mg, 0.032 mmol), Na<sub>2</sub>CO<sub>3</sub> (291 mg, 2.75 mmol) and LiCl (74 mg, 1.75 mmol) in dioxane / H<sub>2</sub>O (10 mL, 3/1,v/v) was stirred at 50 °C for 2 h. The mixture was concentrated under

reduced pressure and purified by prep-HPLC to give 26.5 mg of title compound **22** as a white solid. Yield 10.5%. <sup>1</sup>H NMR (400 MHz, DMSO-*d*<sub>6</sub>) δ 9.72 (s, 1H), 8.55 (d, *J* = 5.0 Hz, 1H), 8.46 (s, 1H), 8.40 (d, *J* = 2.5 Hz, 1H), 7.75 (d, *J* = 2.5 Hz, 1H), 7.49 (d, *J* = 5.0 Hz, 1H), 4.86 (t, *J* = 5.0 Hz, 1H), 4.41 – 4.28 (m, 2H), 3.59 (s, 3H), 2.98 – 2.90 (m, 2H), 2.89 – 2.81 (m, 2H), 2.31 – 2.21 (m, 1H), 1.96 – 1.79 (m, 4H), 0.81 – 0.74 (m, 4H). <sup>13</sup>C NMR (101 MHz, DMSO) δ 172.95, 156.41, 156.34, 153.69, 148.37, 148.00, 146.76, 138.70, 133.38, 132.29 (doublet), 131.77, 130.95, 128.21, 125.51, 123.57, 114.90, 56.33, 37.61, 25.20, 23.11, 22.54, 21.28, 14.18, 7.70. HRMS (ESI+) *m/z* found MH<sup>+</sup> 504.1696, C<sub>26</sub>H<sub>26</sub>N<sub>5</sub>O<sub>4</sub>S requires 504.1700.

Scheme S8. Preparation of **21** via Buchwald amidation. <sup>a</sup>

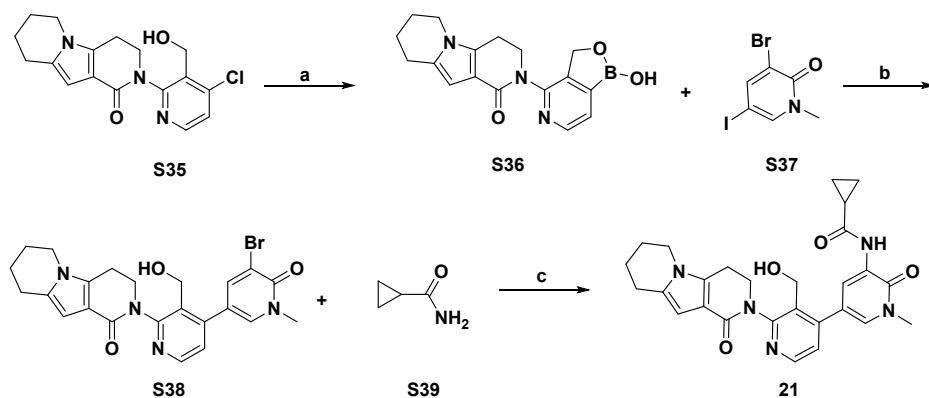

<sup>a</sup>Reagents: (a)  $B_2(OH)_4$ , XPhos-Pd-G2, XPhos, KOAc, EtOH, 80 °C, 1h, 70% yield; (b)  $Pd(dppf)Cl_2$ ,  $Na_2CO_3$ , LiCl, dioxane /  $H_2O$  (10 mL, 3/1, v/v) 50 °C, 2 h, 33% yield; (c) XantPhos,  $Cs_2CO_3$ ,  $Pd_2(dba)_3$ , 1,4-dioxane, 100 °C, 1h, 24.5% yield.

*N*-(3'-(hydroxymethyl)-1-methyl-6-oxo-2'-(1-oxo-3,4,6,7,8,9-hexahydropyrazino[1,2-*a*]indol-2(1H)-yl)-1,6-dihydro-[3,4'-bipyridin]-5-yl)cyclopropanecarboxamide **21**

Step 1: Preparation of 2-(1-hydroxy-1,3-dihydro-[1,2]oxaborolo[4,3-*c*]pyridin-4-yl)-3,4,6,7,8,9-hexahydropyrido[3,4-*b*]indolizin-1(2*H*)-one **S36**

Following the procedure described for **22**, step 3, replacing 3-(4-chloro-3-(hydroxymethyl)pyridin-2-yl)-6,7,8,9-tetrahydrobenzo[4,5]thieno[2,3-*d*]pyridazin-4(3*H*)-one **S33** with 2-(4-chloro-3-(hydroxymethyl)pyridin-2-yl)-3,4,6,7,8,9-hexahydropyrido[3,4-*b*]indolizin-1(2*H*)-one **S35**, compound **S36** was prepared. Yield 70%.

Step 2: Preparation of 2-(5-bromo-3'-(hydroxymethyl)-1-methyl-6-oxo-1,6-dihydro-[3,4'-bipyridin]-2'-yl)-3,4,6,7,8,9-hexahydropyrido[3,4-*b*]indolizin-1(2*H*)-one **S38**

Following the procedure described for **22**, step 4, replacing 3-(1-hydroxy-1,3-dihydro-[1,2]oxaborolo[4,3-*c*]pyridin-4-yl)-6,7,8,9-tetrahydrobenzo[4,5]thieno[2,3-*d*]pyridazin-4(3*H*)-one **S34** and *N*-(5-bromo-1-methyl-2-oxo-1,2-dihydropyridin-3-yl)cyclopropanecarboxamide **S16a** with 2-(1-hydroxy-1,3-dihydro-[1,2]oxaborolo[4,3-*c*]pyridin-4-yl)-3,4,6,7,8,9-hexahydropyrido[3,4-*b*]indolizin-1(2*H*)-one **S36** and 3-bromo-5-iodo-1-methylpyridin-2(1*H*)-one **S37**, respectively, **S38** was prepared. Yield 33%.

### Step 3: Preparation of **21**

To a mixture of 2-(5-bromo-3'-(hydroxymethyl)-1-methyl-6-oxo-1,6-dihydro-[3,4'-bipyridin]-2'-yl)-3,4,6,7,8,9-hexahydropyrido[3,4-*b*]indolizin-1(2*H*)-one (100 mg, 0.21 mmol) and cyclopropanecarboxamide (53.5 mg, 0.63 mmol) in 1,4-dioxane (4 mL) were added Xantphos (12.2 mg, 0.02 mmol), Cs<sub>2</sub>CO<sub>3</sub> (205 mg, 0.63 mmol), followed by Pd<sub>2</sub>(dba)<sub>3</sub> (10 mg, 0.0105 mmol). The resulting mixture was stirred at 100 °C for 1h. The reaction mixture was diluted in water and filtered. The filtrate was extracted with ethyl acetate (20 mL x 3). The combined organic layers were dried over Na<sub>2</sub>SO<sub>4</sub> and concentrated under reduced pressure. The residue was purified by flash column chromatography (SiO<sub>2</sub>: methanol / ethyl acetate) to give 25 mg of the title compound as a white solid. Yield 24.5%. <sup>1</sup>H NMR (400 MHz, DMSO-*d*<sub>6</sub>) δ 9.68 (s, 1H), 8.47 – 8.38 (m, 2H), 7.75 (d, *J* = 2.4 Hz, 1H), 7.25 (d, *J* = 5.0 Hz, 1H), 6.03 (s, 1H), 4.84 (s, 1H), 4.43 – 4.26 (m, 2H), 4.19 – 4.08 (m, 1H), 3.99 – 3.89 (m, 1H), 3.83 – 3.74 (m, 2H), 3.59 (s, 3H), 3.06 – 2.88 (m, 2H), 2.71 (t, *J* = 6.4 Hz, 2H), 2.31 – 2.20 (m, 1H), 1.96 – 1.86 (m, 2H), 1.83 – 1.67 (m, 2H), 0.81 – 0.73 (m 4H). <sup>13</sup>C NMR (101 MHz, DMSO) δ 172.84, 166.4, 164.90, 156.40, 155.72, 147.80, 147.58, 135.79, 132.01, 130.57, 129.91, 128.12, 123.75, 123.09, 115.83, 112.31, 102.03, 57.32, 48.78, 42.51, 37.60, 23.07, 22.66, 20.69, 20.40, 14.18, 7.66. HRMS (ESI+) *m/z* found MH<sup>+</sup> 488.2287, C<sub>27</sub>H<sub>30</sub>N<sub>5</sub>O<sub>4</sub> requires 488.2292.

Scheme S9. Preparation of **28** and **29**.<sup>a</sup>

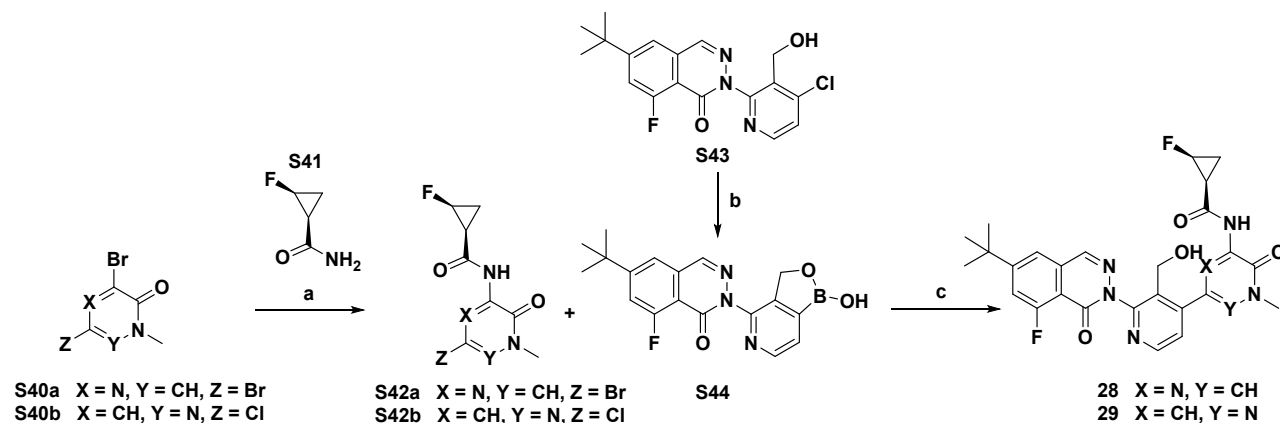

<sup>a</sup>Reagents: (a) Pd<sub>2</sub>(dba)<sub>3</sub>, Xantphos, Cs<sub>2</sub>CO<sub>3</sub>, 1,4-dioxane, 110 °C, 1h, 30–76% yield; (b) B<sub>2</sub>(OH)<sub>4</sub>, XPhos-Pd-G2, XPhos, KOAc, EtOH, 80 °C, 1h, 92% yield; (c) Pd(dppf)Cl<sub>2</sub>, Na<sub>2</sub>CO<sub>3</sub>, LiCl, 1,4-dioxane, H<sub>2</sub>O, 80 °C, microwave, 1h, 13–20% yield.

(1*S*,2*S*)-*N*-(6-(2-(6-(*tert*-butyl)-8-fluoro-1-oxophthalazin-2(1*H*)-yl)-3-(hydroxymethyl)pyridin-4-yl)-4-methyl-3-oxo-3,4-dihydropyrazin-2-yl)-2-fluorocyclopropanecarboxamide **28**

Step 1: (1*S*,2*S*)-*N*-(6-bromo-4-methyl-3-oxo-3,4-dihydropyrazin-2-yl)-2-fluorocyclopropanecarboxamide **S42a**

To a mixture of 3,5-dibromo-1-methylpyrazin-2(1*H*)-one **S40a** (200 mg, 0.7 mmol) and (1*S*,2*S*)-2-fluorocyclopropanecarboxamide **S41** (72 mg, 0.7 mmol) in 1,4-dioxane (20 ml) were added Xantphos (41 mg, 0.07 mmol), cesium carbonate (456 mg, 1.4 mmol), followed by tris(dibenzylideneacetone)dipalladium(0) (32 mg, 0.035 mmol). The resulting mixture was stirred at 110 °C for 1h under nitrogen and then diluted with water and filtered. The filtrate was extracted with ethyl acetate (20 mL×3). The combined organic layers were dried over anhydrous sodium sulfate and concentrated under reduced pressure. The residue was purified by flash column chromatography (SiO<sub>2</sub>: MeOH / DCM) to afford 80 mg of **S42a** as a yellow solid. Yield 30%. MS (ESI<sup>+</sup>) *m/z* found MH<sup>+</sup> 290, C<sub>9</sub>H<sub>10</sub>BrFN<sub>3</sub>O<sub>2</sub> requires 289.99.

Step 2: Preparation of 6-(*tert*-butyl)-8-fluoro-2-(1-hydroxy-1,3-dihydro-[1,2]oxaborolo[4,3-*c*]pyridin-4-yl)phthalazin-1(2*H*)-one **S44**

Following the procedure described for **22**, step 3, replacing 3-(4-chloro-3-(hydroxymethyl)pyridin-2-yl)-6,7,8,9-tetrahydrobenzo[4,5]thieno[2,3-*d*]pyridazin-4(3*H*)-one

**S33** with 6-(*tert*-butyl)-2-(4-chloro-3-(hydroxymethyl)pyridin-2-yl)-8-fluorophthalazin-1(2*H*)-one **S43**, compound **S44** was prepared. Yield 92%.

### Step 3: Preparation of title compound **28**

To a mixture of (1*S*,2*S*)-*N*-(6-bromo-4-methyl-3-oxo-3,4-dihydropyrazin-2-yl)-2-fluorocyclopropanecarboxamide **S42a** (70 mg, 0.24 mmol) and 6-(*tert*-butyl)-8-fluoro-2-(1-hydroxy-1,3-dihydro-[1,2]oxaborolo[4,3-*c*]pyridin-4-yl)phthalazin-1(2*H*)-one **S44** (85 mg, 0.24 mmol) in 1,4-dioxane (10 mL) and water (2 mL) were added sodium carbonate (127 mg, 1.2 mmol), lithium chloride (30 mg, 0.72 mmol) and 1,1'-bis(diphenylphosphino)ferrocene palladium dichloride dichloromethane (9.8 mg, 0.012 mmol). The mixture was stirred at 80 °C for 1h under nitrogen. The resulting mixture was diluted with water, and extracted with ethyl acetate (20 mL×3). The organic layers were dried over anhydrous sodium sulfate and concentrated under reduced pressure. The crude residue was purified by flash column chromatography (SiO<sub>2</sub>: MeOH / DCM) to afford 17 mg of the title compound **28** as a white solid. 13% Yield. <sup>1</sup>H NMR (400 MHz, DMSO-*d*<sub>6</sub>) δ 10.59 (d, *J* = 6.7 Hz, 1H), 8.57 (d, *J* = 5.0 Hz, 1H), 8.54 (d, *J* = 2.6 Hz, 1H), 8.07 (s, 1H), 7.91 (d, *J* = 1.8 Hz, 1H), 7.78 (dd, *J* = 13.2, 1.7 Hz, 1H), 7.65 (d, *J* = 5.0 Hz, 1H), 5.30 – 5.19 (m, 1H), 5.04 – 4.80 (m, 1H), 4.42 – 4.30 (m, 1H), 4.28 – 4.18 (m, 1H), 3.60 (s, 3H), 2.63 – 2.53 (m, 1H), 1.65 – 1.52 (m, 1H), 1.39 (s, 9H), 1.24 – 1.12 (m, 1H). <sup>13</sup>C NMR (101 MHz, DMSO) δ 165.78 (d), 161.70, 160.16 (d), 159.09, 155.61 (d), 154.05, 150.35, 148.17, 147.15, 144.09, 137.70, 131.91, 131.37, 127.63, 126.86, 124.17, 119.78 (d), 117.13, 116.92, 73.89, 71.63, 56.31, 37.23, 35.60, 30.48, 21.77 (d), 11.14 (d). HRMS (ESI+) *m/z* found MH<sup>+</sup> 537.2050, C<sub>27</sub>H<sub>27</sub>F<sub>2</sub>N<sub>6</sub>O<sub>4</sub> requires 537.2056.

(1*S*,2*S*)-*N*-(6-(2-(6-(*tert*-butyl)-8-fluoro-1-oxophthalazin-2(1*H*)-yl)-3-(hydroxymethyl)pyridin-4-yl)-2-methyl-3-oxo-2,3-dihydropyridazin-4-yl)-2-fluorocyclopropane-1-carboxamide **29**

Compound **29** was prepared in a similar manner to **28**, replacing 3,5-dibromo-1-methylpyrazin-2(1*H*)-one **S42a** with 4-bromo-6-chloro-2-methylpyridazin-3(2*H*)-one **S42b**. Yield 15.2% over two-steps. <sup>1</sup>H NMR (400 MHz, DMSO-*d*<sub>6</sub>) δ 10.42 (s, 1H), 8.63 (d, *J* = 5.0 Hz, 1H), 8.54 (d, *J* = 2.5 Hz, 1H), 8.31 (s, 1H), 7.90 (d, *J* = 1.8 Hz, 1H), 7.77 (dd, *J* = 13.1, 1.8 Hz, 1H), 7.60 (d, *J* = 5.0 Hz, 1H), 5.07 – 4.83 (m, 2H), 4.46 – 4.34 (m, 2H), 3.80 (s, 3H), 2.69 – 2.58 (m, 1H), 1.72 – 1.57 (m, 1H), 1.39 (s, 9H), 1.28 – 1.16 (m, 1H). <sup>13</sup>C NMR (101 MHz, DMSO) δ 167.80 (d), 161.77, 160.18 (d), 155.57 (d), 154.61, 153.03, 148.25, 146.46, 144.43, 137.95, 135.75, 135.70, 131.96

(d), 124.92, 119.78, 117.14, 116.93, 113.71 (d), 113.06, 73.97, 71.70, 56.20, 40.37, 35.60, 30.47, 21.52 (d), 11.33 (d). HRMS (ESI+)  $m/z$  found  $MH^+$  537.2049,  $C_{27}H_{27}F_2N_6O_4$  requires 537.2056.

Scheme S10. Preparation of **S8** and **S43**.<sup>a</sup>

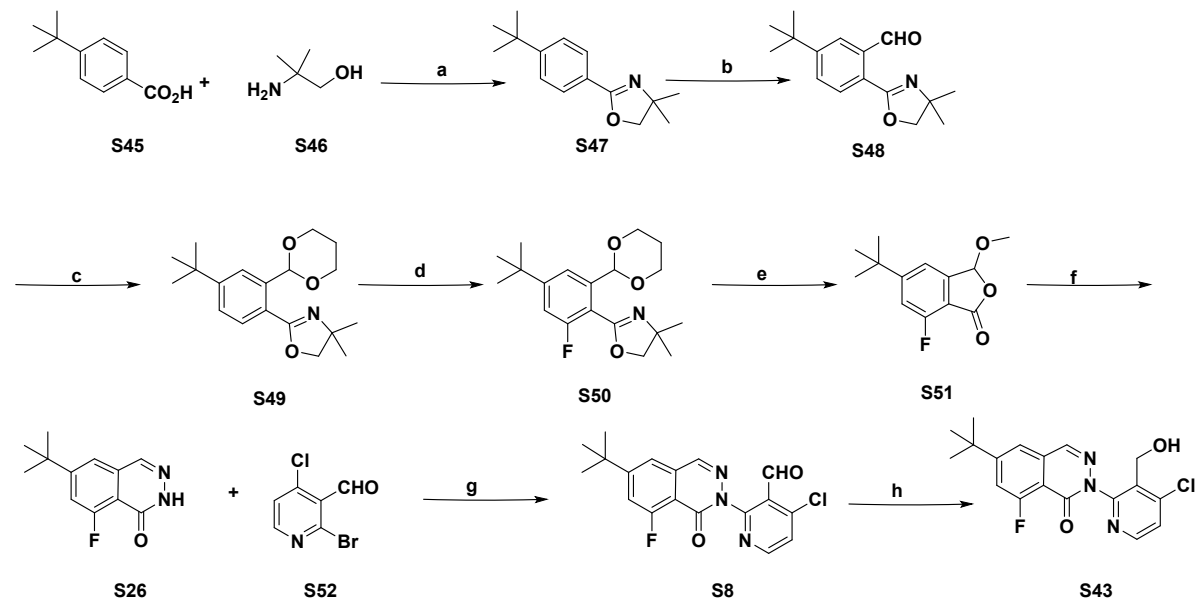

<sup>a</sup>Reagents and conditions: (a) (i)  $SO_2Cl_2$ , reflux, 3h; (ii) DCM, 0 °C to RT, overnight; (iii)  $SOCl_2$ , reflux, 1h, 41% yield; (b) (i)  $nBuLi$  (2.4M in hexane), THF, 78 °C to -20 °C 4h; (ii) DMF, -78 °C to RT, 2h 15 min, 62% yield; (c) 1,3-propanediol, PPTS, toluene, reflux, overnight, 22% yield; (d) 50% aq.  $H_2SO_4$ , MeOH, reflux, overnight; (e) (i)  $nBuLi$  (2.4 M in hexane), THF, -78 °C to -17 °C, 3h; (ii) NFSI, THF, -78 °C to -20 °C to RT, 1h (f)  $NH_2NH_2 \cdot H_2O$ , glacial AcOH, 0 to 50 °C, 1.5h, 38% yield over 2 steps; (g)  $CuI$ , 4,7-dimethoxy-1,10-phenanthroline, KOAc, dioxane, 90 °C, 10h, 25% yield; (h)  $NaBH_4$ , MeOH, RT, 1h, 90% yield.

2-(6-(*tert*-Butyl)-8-fluoro-1-oxophthalazin-2(1*H*)-yl)-4-chloronicotinaldehyde **S8**

Step 1: 2-(4-(*tert*-butyl)phenyl)-4,4-dimethyl-4,5-dihydrooxazole **S47**

A mixture of 4-(*tert*-butyl)benzoic acid (1000 g, 5.6 mol) in  $SO_2Cl_2$  (1.5 L) was refluxed for 3 hours. The solvent was then concentrated under reduced pressure to give crude 4-(*tert*-butyl)benzoyl chloride and DCM (200 mL) was added. To this reaction mixture at 0 °C was added dropwise a solution of 2-amino-2-methylpropan-1-ol (1000 g, 10.5 mol) in DCM (2000 mL), while keeping the internal temperature between 0 to 10 °C. A white precipitate formed 5 minutes after



the initial addition. The slurry was stirred at room temperature overnight, and the resulting white precipitate was filtered and rinsed with DCM (1000 mL). The filtrate was concentrated under reduced pressure to give 4-(*tert*-butyl)-*N*-(1-hydroxy-2-methylpropan-2-yl)benzamide as a light yellow solid which was used in the next step without further purification. A stirred mixture of crude 4-(*tert*-butyl)-*N*-(1-hydroxy-2-methylpropan-2-yl)benzamide (1000 g, 4 mmol) in SOCl<sub>2</sub> (1.5 L) was refluxed for 1 hour. The reaction mixture was cooled to room temperature and slowly added to stirred ether (500 mL), during which time a white precipitate formed. The precipitate was collected by filtration and washed with additional ether. The solid was then dissolved in water (500 mL) and neutralized with 25% aq. NaOH solution. The aqueous solution was extracted with EtOAc (3 x 500 mL), and the combined organic layers were washed with brine (500 mL), dried over Na<sub>2</sub>SO<sub>4</sub>, filtered, and concentrated under reduced pressure to afford 530 g of **S47** as a white solid. Yield: 41%. <sup>1</sup>HNMR (300 MHz, Chloroform-*d*)  $\delta$  7.87 (d, J = 8.4 Hz, 2H), 7.41 (d, J = 8.4 Hz, 2H), 4.08 (s, 2H), 1.37 (s, 6H), 1.33 (s, 9H).

#### Step 2: 5-(*tert*-Butyl)-2-(4,4-dimethyl-4,5-dihydrooxazol-2-yl)benzaldehyde **S48**

To a solution of 2-(4-(*tert*-butyl)phenyl)-4,4-dimethyl-4,5-dihydrooxazole **S47** (50 g, 0.22 mol) in anhydrous THF (750 mL) under N<sub>2</sub> was added *n*-butyllithium (230 mL, 0.55 mol, 2.5 equiv., 2.4 M in hexane) at -78 °C. The amber solution was warmed to -20 °C and stirred for 4 h. The reaction mixture became cloudy and has a dark red amber color. The mixture was re-cooled to -78 °C and stirred rapidly before DMF (72 mL, 0.95 mol, 4.3 equiv.) was added dropwise at such a rate that the temperature was controlled below -60 °C. After the addition, the reaction mixture was stirred at -78 °C for 15 min, at -20 °C for 1 h, and at RT for 1 h more. The reaction mixture was quenched with 0.5 M KHSO<sub>4</sub> (200 mL). Additional 0.5 M KHSO<sub>4</sub> was added to the reaction mixture until the pH was adjusted to 4-5. The aqueous phase was extracted with EtOAc (3 x 500 mL), and the combined organic layers were washed with brine (400 mL), dried over Na<sub>2</sub>SO<sub>4</sub>, filtered, and concentrated under reduced pressure to give 35 g of **S48** as a yellow solid. Yield: 62%. MS [ESI-MS] (ESI+) *m/z* found MH<sup>+</sup> 260, C<sub>16</sub>H<sub>22</sub>NO<sub>2</sub> requires 260.

#### Step 3: 2-(4-(*tert*-Butyl)-2-(1,3-dioxan-2-yl)phenyl)-4,4-dimethyl-4,5-dihydrooxazole **S49**

A mixture of 5-(*tert*-butyl)-2-(4,4-dimethyl-4,5-dihydrooxazol-2-yl)benzaldehyde **S48** (60 g, 0.23 mol), PPTS (4 g, 0.02 mol) and 1,3-propanediol (60 mL, 0.83 mol, 3.6 equiv.) in toluene (500 mL) was heated to reflux overnight and then cooled to room temperature. The reaction mixture

was quenched with 50% aq. NaHCO<sub>3</sub> solution (200 mL), and the organic layer was washed with water (200 mL), brine (200 mL), dried over Na<sub>2</sub>SO<sub>4</sub>, filtered, and concentrated under reduced pressure. The crude residue was purified by flash column chromatography (SiO<sub>2</sub>: ethyl acetate / petroleum ether) to afford 16 g of **S49** as a yellow gum. Yield: 22%. <sup>1</sup>HNMR (300 MHz, Chloroform-*d*)  $\delta$  7.79 (s, 1 H), 7.67 (d, J = 8.0 Hz, 1H), 7.36 (dd, J = 8.4, 1.6 Hz, 1H), 6.32 (s, 1H), 4.23 (dd, J = 5.2, 11.2 Hz, 2H), 4.06 (s, 2H), 4.04 – 3.98 (m, 2H), 2.27 – 2.21 (m, 1H), 1.48 – 1.38 (m, 1H), 1.38 (s, 6H), 1.32 (s, 9H). MS [ES-MS] (ESI+) m/z found MH<sup>+</sup> 318, C<sub>19</sub>H<sub>28</sub>NO<sub>3</sub> requires 318.

Step 4: 2-(4-(*tert*-Butyl)-2-(1,3-dioxan-2-yl)-6-fluorophenyl)-4,4-dimethyl-4,5-dihydrooxazole **S50**

To a solution of 2-(4-(*tert*-butyl)-2-(1,3-dioxan-2-yl)phenyl)-4,4-dimethyl-4,5-dihydrooxazole **S49** (20 g, 63 mmol) in anhydrous THF (400 mL) was added *n*-BuLi (65 mL, 157 mmol, 2.5 equiv., 2.4 M in hexane) at -78 °C under N<sub>2</sub>. The clear yellow solution was stirred at -17 °C for 3 h. The deep red-orange color reaction solution was re-cooled to -78 °C, and a solution of NFSI (29 g, 92 mmol) in anhydrous THF (100 mL) was added dropwise over 10 min. The reaction mixture was stirred at -78 °C for 5 min, -20 °C for 30 min, then at room temperature for 1h. The reaction mixture was quenched with 50% aq. NH<sub>4</sub>Cl solution (150 mL) and extracted EtOAc (300 mL). The organic layer was washed with water (150 mL) and brine (150 mL), dried over Na<sub>2</sub>SO<sub>4</sub>, filtered, and concentrated under reduced pressure. The crude residue was purified by flash column chromatography (SiO<sub>2</sub>: ethyl acetate / DCM) to afford 7 g of **S50** as yellow solid. Yield: 33%. <sup>1</sup>HNMR (300 MHz, Chloroform-*d*)  $\delta$  7.53 (d, J = 1.6 Hz, 1H), 7.08 (dd, J = 12.0, 2.0 Hz, 1 H), 5.90 (s, 1H), 4.24 (dd, J = 10.8, 5.2 Hz, 2H), 4.06 (s, 2H), 3.98 – 3.91 (m, 2H), 2.26 2.19 (m, 1H), 1.45 – 1.42 (m, 1H), 1.42 (s, 6H), 1.30 (s, 9H). MS [ES-MS] (ESI+) m/z found MH<sup>+</sup> 336, C<sub>19</sub>H<sub>27</sub>FNO<sub>3</sub> requires 336.

Step 5: 5-(*tert*-Butyl)-7-fluoro-3-methoxyisobenzofuran-1(3*H*)-one **S51**

A stirred mixture of 2-(4-(*tert*-butyl)-2-(1,3-dioxan-2-yl)-6-fluorophenyl)-4,4-dimethyl-4,5-dihydrooxazole **S50** (68.8 g, 205.4 mmol) in MeOH (1.34 L) and 50% aq. H<sub>2</sub>SO<sub>4</sub> (881 mL) was stirred at reflux overnight. The reaction mixture was diluted with water (400 mL) and extracted with DCM (3 x 1L). The combined organic layers were washed with brine (400 mL), dried over

Na<sub>2</sub>SO<sub>4</sub>, filtered, and concentrated under reduced pressure to provide 43 g of **S51** as an off-white solid which was used in the next step without further purification.

**Step 6: 6-*tert*-Butyl-8-fluorophthalazin-1(2*H*)-one S26**

To a stirred solution of 5-(*tert*-butyl)-7-fluoro-3-methoxyisobenzofuran-1(3*H*)-one **S51** (40 g, 168 mmol) in glacial acetic acid (360 mL) was added hydrazine monohydrate (240 mL) at 0 °C under N<sub>2</sub>. The resulting slurry was stirred under at 50 °C for 1.5 h. The reaction mixture was diluted with water (300 mL), and the aqueous layer was extracted with DCM (2 x 500 mL). The combined organic layers was dried over Na<sub>2</sub>SO<sub>4</sub>, filtered, and concentrated under reduced pressure. The crude residue was recrystallized from DMC and Et<sub>2</sub>O to provide 17g of **S26** as an off-white solid. Yield: 38% over 2 steps. <sup>1</sup>HNMR (300 MHz, Chloroform-*d*) δ 8.11 (d, J = 2.7 Hz, 1H), 7.52 – 7.41 (m, 2H), 1.39 (s, 9 H), NH not seen. MS [ES-MS] (ESI+) m/z found MH<sup>+</sup> 221, C<sub>12</sub>H<sub>14</sub>FN<sub>2</sub>O requires 221.

**Step 7: 2-(6-(*tert*-Butyl)-8-fluoro-1-oxophthalazin-2(1*H*)-yl)-4-chloronicotinaldehyde S8**

To a stirred mixture of 6-*tert*-butyl-8-fluorophthalazin-1(2*H*)-one **S26** (300 mg, 1.36 mmol) and 2-bromo-4-chloronicotinaldehyde **S52** (446 mg, 2.05 mmol, 1.5 equiv.) in dioxane (50 mL) was added KOAc (267 mg, 2.72 mmol, 2.0 equiv.), CuI (259 mg, 1.36 mmol, 1.0 equiv.), and 4,7-dimethoxy-1,10-phenanthroline (327 mg, 1.36 mmol, 1.0 equiv.). Nitrogen was bubbled through the reaction mixture for 30 min, and the mixture was stirred at 90 °C for 10 h. Water (100 mL) was added to the cooled reaction, and the aqueous layer was extracted with EtOAc (2 x 200 mL). The combined organic layers were washed with brine (100 mL) and dried over Na<sub>2</sub>SO<sub>4</sub>, filtered, and concentrated under reduced pressure. The crude residue was purified by flash column chromatography (SiO<sub>2</sub>: ethyl acetate / petroleum ether) to afford 120 mg of **S8**. Yield: 25%. <sup>1</sup>HNMR (500 MHz, Chloroform-*d*) δ 10.36 (s, 1H), 8.69 (d, J = 5.5 Hz, 1H), 8.28 (d, J = 2.0 Hz, 1H), 7.28 – 7.56 (m, 3H), 1.49 (s, 9H). MS [ES-MS] (ESI+) m/z found MH<sup>+</sup> 360, C<sub>18</sub>H<sub>16</sub>ClFN<sub>3</sub>O<sub>2</sub> requires 360.

**6-(*tert*-Butyl)-2-(4-chloro-3-(hydroxymethyl)pyridin-2-yl)-8-fluorophthalazin-1(2*H*)-one S43**

To a solution of 2-(6-(*tert*-butyl)-8-fluoro-1-oxophthalazin-2(1*H*)-yl)-4-chloronicotinaldehyde **S8** (2.0 g, 5.5 mmol) in MeOH (30 mL) was added NaBH<sub>4</sub> (700 mg, 16.5 mmol, 3.0 equiv.) at room temperature. The reaction mixture was stirred for 1 h and quenched with water (30 mL). Volatile solvent was removed under reduced pressure, and the aqueous phase was extracted with DCM (3 x 30mL). The combined organic layers were dried over anhydrous Na<sub>2</sub>SO<sub>4</sub>, filtered, and

evaporated under reduced pressure to afford 1.8 g of **S43** as a white solid. Yield: 90%. MS [ES-MS] (ESI+)  $m/z$  found  $MH^+$  362,  $C_{18}H_{18}ClFN_3O_2$  requires 362.

Scheme S11. Preparation of **S15**.<sup>a</sup>

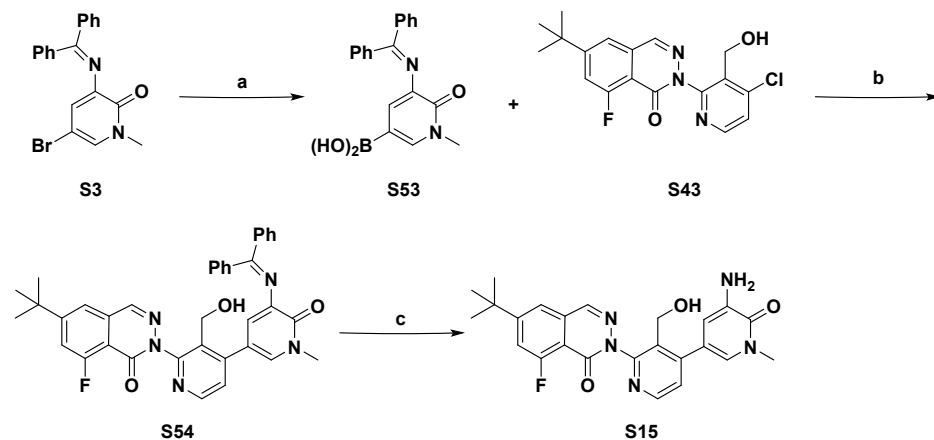

<sup>a</sup>Reagents and conditions: (a)  $Pin_2B_2$ , KOAc, XPhos,  $Pd_2(dba)_3$ , dioxane,  $60^\circ C$ , 3 h, 93% yield; (b)  $Pd(dppf)Cl_2$ ,  $K_3PO_4$ , NaOAc, ACN,  $H_2O$ ,  $100^\circ C$ , 2 h, 40% yield; (c) 4M HCl in dioxane,  $25^\circ C$ , 1 h, 50% yield.

2-(5-Amino-3'-(hydroxymethyl)-1-methyl-6-oxo-1,6-dihydro-[3,4'-bipyridin]-2'-yl)-6-(*tert*-butyl)-8-fluorophthalazin-1(2*H*)-one **S15**

Step 1: (5-((Diphenylmethylene)amino)-1-methyl-6-oxo-1,6-dihydropyridin-3-yl)boronic acid **S53**

A 100-mL round-bottomed flask equipped with a reflux condenser was charged with 5-bromo-3-((diphenylmethylene)amino)-1-methylpyridin-2(1*H*)-one (3.0 g, 8.0 mmol),  $Pin_2B_2$  (6.1 g, 24.0 mmol, 3.0 equiv.),  $Pd_2(dba)_3$  (290 mg, 0.40 mmol, 0.05 equiv.), XPhos (385 mg, 0.80 mmol, 0.1 equiv.), KOAc (1.6 g, 16.0 mmol, 2.0 equiv.), and 1,4-dioxane (30 mL). After three cycles of vacuum/argon flush, the mixture was stirred at  $60^\circ C$  for 3h. The reaction was cooled and filtered, and the filtrate was evaporated under reduced pressure. The crude residue was washed with PE to afford 2.5 g of S53 as brown oil, which was used directly without further purification. Yield: 93%. MS [ES-MS] (ESI+)  $m/z$  found  $MH^+$  333,  $C_{19}H_{18}BN_2O_2$  requires 333.

Step 2: 6-(*tert*-Butyl)-2-(5-((diphenylmethylene)amino)-3'-(hydroxymethyl)-1-methyl-6-oxo-1,6-dihydro-[3,4'-bipyridin]-2'-yl)-8-fluorophthalazin-1(2*H*)-one **S54**

A 50-mL round-bottomed flask equipped with a reflux condenser was charged with (5-((diphenylmethylene)amino)-1-methyl-6-oxo-1,6-dihydropyridin-3-yl)boronic acid **S53** (2.0 g, 6.0 mmol), 6-(*tert*-butyl)-2-(4-chloro-3-(hydroxymethyl)pyridin-2-yl)-8-fluorophthalazin-1(2*H*)-one **S43** (2.17 g, 6.0 mmol, 1.0 equiv.), K<sub>3</sub>PO<sub>4</sub> (2.54 g, 12.0 mmol, 2.0 equiv.), NaOAc (1.0 g, 12.0 mmol, 2.0 equiv.), Pd(dppf)Cl<sub>2</sub> (245 mg, 0.3 mmol, 0.05 equiv.), ACN (15 mL), and H<sub>2</sub>O (12 mL). After three cycles of vacuum/argon flush, the reaction mixture was stirred at 100 °C under N<sub>2</sub> for 2 h. The reaction was cooled to room temperature and filtered. The filtrate was concentrated under reduced pressure. The residue was diluted with DCM (20 mL) and water (10 mL). The aqueous layer was extracted with DCM (2x10 mL). The combined organic layers were dried over Na<sub>2</sub>SO<sub>4</sub>, filtered, and concentrated under reduced pressure. The crude residue was purified by flash column chromatography (SiO<sub>2</sub>: MeOH / DCM) to afford 1.6 g of **S54** as yellow solid. Yield: 40%. MS [ES-MS] (ESI+) *m/z* found MH<sup>+</sup> 614, C<sub>37</sub>H<sub>33</sub>FN<sub>5</sub>O<sub>3</sub> requires 614.

Step 3: 2-(5-Amino-3'-(hydroxymethyl)-1-methyl-6-oxo-1,6-dihydro-[3,4'-bipyridin]-2'-yl)-6-(*tert*-butyl)-8-fluorophthalazin-1(2*H*)-one **S15**

A mixture of 6-(*tert*-butyl)-2-(5-((diphenylmethylene)amino)-3'-(hydroxymethyl)-1-methyl-6-oxo-1,6-dihydro-[3,4'-bipyridin]-2'-yl)-8-fluorophthalazin-1(2*H*)-one **S54** (1.6 g, 2.6 mmol) in 4M HCl in dioxane (10 mL) was stirred at 25 °C for 1 h. The mixture was evaporated under reduced pressure, and the crude residue was purified by reverse-phase prep-HPLC to afford 580 mg of **S15** as a pale yellow solid. Yield: 50%. <sup>1</sup>H NMR (500 MHz, DMSO-*d*<sub>6</sub>) δ 8.53 – 8.52 (m, 2H), 7.90 (d, *J* = 1.0 Hz, 1H), 7.79 – 7.76 (m, 1H), 7.45 (d, *J* = 5.0 Hz, 1H), 7.24 (d, *J* = 2.5 Hz, 1H), 6.65 (d, *J* = 2.0 Hz, 1H), 5.33 (s, 2H), 4.95 – 4.93 (m, 1H), 4.39 (s, 2H), 3.52 (s, 3H), 1.38 (s, 9H). MS [ES-MS] (ESI+) *m/z* found MH<sup>+</sup> 450, C<sub>24</sub>H<sub>25</sub>FN<sub>5</sub>O<sub>3</sub> requires 450.

Scheme S12. Preparation of **S35**.<sup>a</sup>

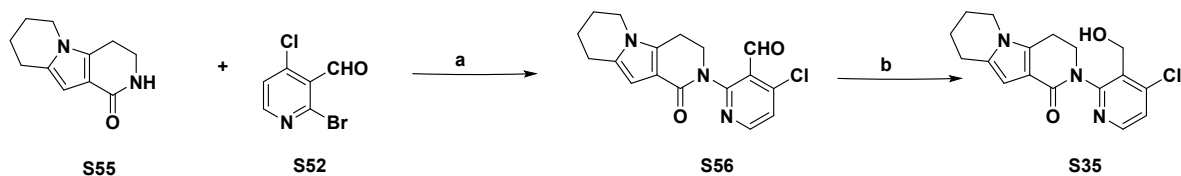

<sup>a</sup>Reagents and conditions: (a) Pd<sub>2</sub>(dba)<sub>3</sub>, XantPhos, K<sub>2</sub>CO<sub>3</sub>, dioxane, 80 °C, overnight, 50% yield; (b) NaBH<sub>4</sub>, MeOH, 30 °C, 1 h, 92% yield.

2-(4-Chloro-3-(hydroxymethyl)pyridin-2-yl)-3,4,6,7,8,9-hexahydropyrido[3,4-*b*]indolizin-1(2*H*)-one **S35**

Step 1: 4-Chloro-2-(1-oxo-3,4,6,7,8,9-hexahydropyrido[3,4-*b*]indolizin-2(1*H*)-yl)nicotinaldehyde **S56**

A 250-mL single-neck round-bottomed flask equipped with a magnetic stirrer and reflux condenser was charged with 1,4-dioxane (50 mL), 3,4,6,7,8,9-hexahydropyrido[3,4-*b*]indolizin-1(2*H*)-one **S55** (0.6 g, 3.2 mmol), 2-bromo-4-chloronicotin-aldehyde **S52** (1.4 g, 6.4 mmol, 2.0 equiv.), Pd<sub>2</sub>(dba)<sub>3</sub> (293 mg, 0.32 mmol, 0.1 equiv.), XantPhos (370 mg, 0.64 mmol, 0.2 equiv.), and potassium carbonate (627 mg, 6.4 mmol, 2.0 equiv.). After three cycles of vacuum/argon flush, the mixture was stirred at 80 °C overnight. The reaction was cooled to room temperature and filtered, and the filtrate was evaporated under reduced pressure. The crude residue was purified by flash column chromatography (SiO<sub>2</sub>: MeOH / DCM) to afford 528 mg of **S56** as a yellow solid. Yield: 50%. <sup>1</sup>H NMR (500 MHz, Chloroform-*d*) δ 10.09 (s, 1H), 8.37 (d, *J* = 5.5 Hz, 1H), 7.16 (d, *J* = 5.5 Hz, 1H), 6.25 (s, 1H), 4.29 – 4.32 (m, 2H), 3.83 – 3.86 (m, 2H), 2.96 – 2.99 (m, 2H), 2.75 – 2.78 (m, 2H), 2.00 – 2.07 (m, 2H), 1.82 – 1.85 (m, 2H). MS [ES-MS] (ESI+) *m/z* found MH<sup>+</sup> 330, C<sub>17</sub>H<sub>17</sub>ClN<sub>3</sub>O<sub>2</sub> requires 330.

Step 2: 2-(4-Chloro-3-(hydroxymethyl)pyridin-2-yl)-3,4,6,7,8,9-hexahydropyrido[3,4-*b*]indolizin-1(2*H*)-one **S35**

To a solution of 4-chloro-2-(1-oxo-3,4,6,7,8,9-hexahydropyrido[3,4-*b*]indolizin-2(1*H*)-yl)nicotinaldehyde **S56** (1.0 g, 3.0 mmol) in MeOH (30 mL) was added NaBH<sub>4</sub> (380 mg, 9.0 mmol, 3.0 equiv.). The reaction mixture was stirred at 30 °C for 1 h and then quenched with water (10 mL). Volatile solvent was concentrated under reduced pressure, and the crude was extracted with DCM (3 x 20 mL). The combined organic layers were dried over anhydrous Na<sub>2</sub>SO<sub>4</sub>, filtered, and evaporated under reduced pressure to afford 920 mg of a yellow solid, which was used as is in the next reaction step. Yield: 92%. MS [ES-MS] (ESI+) *m/z* found MH<sup>+</sup> 332, C<sub>17</sub>H<sub>19</sub>ClN<sub>3</sub>O<sub>2</sub> requires 332.

## IN VITRO PHARMACOLOGY

### Btk assays.

Btk kinase activity and inhibition was assessed using a peptide phosphorylation assay as previously described (1). The inhibitor concentration at 50% inhibition ( $IC_{50}$ ) values were calculated from inhibitor titration data by plotting the % of Control Btk activity against test article concentration and fitting the data to a standard 4-parameter sigmoidal inhibition equation using Prism v5 software (GraphPad Software LLC; San Diego, CA, USA).

### *In vitro* whole blood pBTK assay.

Heparinized human whole blood was treated with test article for 1 h at 37 °C (0.4% DMSO final concentration). Blood was lysed with 2X lysis buffer (Cell Signaling Technology) containing protease (Roche Applied Science) and phosphatase inhibitors (cocktail II and III) (Sigma). Phosphorylation of Btk at the Y223 residue was evaluated using Meso Scale Discovery (MSD) technology. Mouse anti-total Btk Ab (BD Bioscience) and rabbit anti-pBtk-Y223 mAbs (Epitomics) followed by a SULFO-TAG anti-rabbit Ab (MSD) were used for detection.

### Human whole blood CD69 assay.

Heparinized human whole blood was incubated with test article for 1 h at 37 °C (11-point titration, with 3-fold dilution with a top concentration of 4.76  $\mu$ M) or 0.4% DMSO vehicle control. Blood was then stimulated with 50  $\mu$ g/mL of goat anti-IgM F(ab')<sub>2</sub> (Southern Biotech) for 18 h. After incubation, B cells were stained with anti-mouse CD19 PerCP (BD Biosciences, clone SJ25C1), anti-mouse CD27 FITC (BD Biosciences, clone L128) and anti-mouse CD69 PE (BD Biosciences, clone FN50) or Isotype IgG1 PE antibodies for 30 min at room temperature followed by RBC lysis using 1X BD lysis buffer. Cells were washed with FACS buffer and fixed with 2% paraformaldehyde. Samples were acquired on BD LSR II and analyzed using BD FACSDiva software. B cells were gated as CD19+CD27- and B cell activation was assessed based on CD69 PE mean fluorescence intensity (MFI).

Measure of error / number of replicates for CD69 and pBtk HWB assays

Mean  $IC_{50}$  +/- SD (n=determinations)

Cmpd **6**: CD69 = 8.5 +/- 5.6 nM (n=6); pBTK = 11 +/- 4.2 nM (n=6)

Cmpd **25**: CD69 = 78 +/- 57 nM (n=3); pBTK = 79 +/- 13 nM (n=7)

### Liver Microsome Metabolic Stability Assays

Metabolic stability of test compounds was evaluated in pooled human, mouse, and rat liver microsomes (BD Biosciences, San Jose, CA). The final incubations contained: 1  $\mu\text{M}$  of the tested compound, 1 mM NADPH, 0.5 mg/mL microsomal protein in 0.1 M potassium phosphate buffer (pH 7.4). Following a 5-minute pre-incubation period, the enzymatic reactions were initiated by the addition of NADPH and test compound to the microsomes diluted in phosphate buffered saline. The mixtures were incubated at 37 °C for 0, 20, 40, and 60 min. Compound concentrations were assessed by LCMS/MS. Intrinsic clearance based upon microsomal stability data was determined using a substrate depletion method and scaled to hepatic clearance using the well-stirred model.<sup>2</sup>

### Hepatocyte Metabolic Stability Assays

Metabolic stability assays of test compounds were carried out using cryopreserved pooled donor mouse, rat, dog, cynomolgus monkey, and human hepatocytes (CellzDirect; Durham, NC). Membrane integrity of the cells was assessed by trypan blue exclusion. Test compounds (1  $\mu\text{M}$  with 0.1% DMSO) were incubated with cells (0.5 million cells/mL) at 37 °C in a 95% air/5% CO<sub>2</sub> atmosphere for 0, 20, 40, or 60 min. Concentrations of test compounds in hepatocyte incubations were determined by LC-MS/MS. Intrinsic clearance was determined using a substrate depletion method and scaled to hepatic clearance using the well-stirred model (*vide supra*).

### In Vitro Permeability Assay in MDCK (Madin-Darby Canine Kidney) Cells

The permeability of test compounds was determined in MDCK cells (American Type Culture Collection; Manassas, VA). Four days prior to use, MDCK cells were seeded at a density of  $2.5 \times 10^5$  cells/mL in 24 well plates. Compounds were dissolved in transport buffer consisting of Hank's Balanced Salt Solution with 10 mM HEPES (Invitrogen Corporation, Grand Island, NY) at a concentration of 10  $\mu\text{M}$ , and permeability was assessed in the apical to basolateral (A-B) and basolateral to apical (B-A) directions following a 3 hour incubation. Lucifer Yellow (Sigma Aldrich, St. Louis, MO) was used as the cell monolayer integrity marker. Test compound concentrations in the donor and receiving compartments were determined by LC-MS/MS. The apparent permeability ( $P_{\text{app}}$ ) of test compounds was determined as follows:

$$P_{\text{app}} = (dQ/dt) \cdot (1/AC_0)$$



Where  $dQ/dt$  is the rate of compound appearance in the receiver compartment,  $Q$  is the quantity of compound,  $C_0$  is the concentration in the donor compartment and  $A$  is the surface area of the insert. Efflux ratio was calculated as  $P_{app, B-A} / P_{app, A-B}$ .

### In Vitro Plasma Protein Binding

In vitro plasma protein binding ( $n = 2$ ) was determined in pooled mouse, rat, and human plasma (Bioreclamation, Inc., Hicksville, NY) by equilibrium dialysis using a Rapid Equilibrium Dialysis (RED) device (Pierce Biotechnology / Thermo Fisher Scientific; Rockford, IL) with a molecular weight cut-off of 8000 Daltons. Test compounds were added to plasma. Plasma samples were equilibrated with phosphate-buffered saline at 37 °C for 4 hours. Compound concentrations in post-dialysis plasma and buffer samples were measured by LC-MS/MS. The percent unbound fraction in plasma for each compound was calculated by dividing the compound concentration in the post-dialysis buffer by that measured in the post-dialysis plasma and multiplying by 100%.

### Reversible CYP and Inhibition Studies in Human Liver Microsomes<sup>3</sup>

Compound **25** was incubated with human liver microsomes (150 donor pool, BD Biosciences, San Jose, CA) fortified with NADPH and isoform-specific probe substrates. Reactions were stopped by the addition of cold acetonitrile/formic acid (94:6 v/v) containing internal standard. Five concentrations of each compound were tested (10, 5, 1, and 0.1  $\mu$ M as well as a solvent control) S30 to generate  $IC_{50}$  values.

### Aqueous Solubility Determinations

Compounds were dissolved in DMSO to a concentration of 10 mM. These solutions were diluted into PBS buffer (pH 7.2, composed with NaCl, KCl,  $Na_2HPO_4$ , and  $KH_2PO_4$ ) to a final compound concentration of 100  $\mu$ M, DMSO concentration of 2%, at pH 7.4. The samples were shaken for 24 hours at room temperature followed by filtration. LC/CLND was used to determine compound concentration in the filtrate, with the concentration calculated by a caffeine calibration curve and the sample's nitrogen content. An internal standard compound was spiked into each sample for accurate quantification.

### hERG Automatic Patch Clamp Assay

The in vitro effects of test articles on hERG potassium channel current expressed in mammalian cells were evaluated at room temperature by using automated patch-clamp technique, the QPatch HT (Sophion Bioscience A/S, Denmark) or QPatch HTX (Sophion Bioscience) at Chantest (Cleveland, OH) or Wuxi AppTec (Shanghai, China), respectively. IC<sub>50s</sub> of **24**, **25**, **33**, and **34** were determined based on the data from five concentrations tested (0.1, 0.3, 1, 3, and 10 μM).

### **Induced Pluripotent Stem Cell (iPSC)-derived Cardiomyocyte Multi-electrode Array Assay**

iPSC-derived cardiomyocytes (icell<sup>4</sup> cardiomyocytes, Fujifilm Cellular Dynamics, Madison, WI) were thawed and plated on 96-well multi-electrode array (MEA) plates (Axion Biosystems, Atlanta, GA) according to manufacturer directions. Briefly, cells were spotted in 5μL droplets over electrodes at a density of 60k/well on fibronectin (Roche, Pleasanton, CA) and maintained for 7 days. A 100% media change was performed one day prior to compound treatment. Compounds were initially diluted in DMSO, and added to wells at 10x target concentration in media for a final DMSO concentration of 0.1%. A single dose per well scheme was utilized with 4 replicates per condition, and time matched controls included untreated (media only), vehicle, cisapride (hERG channel blocker, Sigma Aldrich, St Louis, MO), and nifedipine (calcium channel blocker, Sigma Aldrich). On the day of the experiment, plates were moved from the incubator to the MEA device (Maestro, Axion Biosystems) with environmental controls (37°C and 5% CO<sub>2</sub>) and allowed to equilibrate for 5 minutes prior to recording a baseline measurement. Dosing was performed manually in a biosafety cabinet in under 10 minutes, after which plates were returned to the MEA platform for post-dose recordings. All recordings were at least 5 minutes in length and analyzed using instrument specific software with semi-automated analysis of field potential signals. Endpoints included sodium spike amplitude and field potential duration, which was corrected for beat rate using the Fridericia correction (2). Values were normalized first to baseline, then vehicle. Additionally, beat waveforms were inspected for arrhythmic events and drug-induced beat cessation (quiescence).

## **Pharmacokinetic (PK) study protocols.**

### **Rat pharmacokinetic study.**

Nine male Sprague Dawley rats (275-300g) obtained from Charles River Laboratories (Hollister, CA) were divided evenly into three dose groups (n=3 rats/group). Animals in Group 1 were given a single IV dose of 1 mg/kg compound **25** in 60% polyethylene glycol 400 (PEG400)/15% EtOH/50mM NaCitate, pH 4.2 at 1 mL/kg. Animals in Group 2 were given 5 mg/kg PO dose of **25** in 0.5% hydroxypropyl methyl cellulose (HPMC) /50mM sodium citrate (NaCitate), pH 3.0, as an amorphous solid dispersion (ASD) suspension at 2 mL/kg, and animals in Group 3 were given 5 mg/kg PO dose of **25** in 1% HPMC/0.2% polysorbate 80 (Tween80) /50 mM NaCitate, pH 3.0, as crystalline suspension at 2 mL/kg. The blood samples were collected at 0.033, 0.167, 0.5, 1, 2, 4, 6 and 8 hours after IV administration. For PO administration, the blood samples were collected at 0.083, 0.25, 0.5, 1, 2, 4, 6, and 8 hours post dose. Blood was centrifuged to harvest plasma. Concentration of **25** in each plasma sample was determined by a non-validated liquid chromatography tandem mass spectrometry assay at Genentech, Inc. Pharmacokinetic (PK) analysis was performed using non-compartmental methods and the IV bolus input model (Model 201) or extravascular (Model 200), WinNonlin-Enterprise®, version 5.2.1. Following PO administration (Groups 2 and 3), percent bioavailability (% F) was determined for each animal by dividing the dose-normalized area under the plasma concentration-time curve extrapolated to infinity (AUCinf) obtained following each PO dose by the mean dose-normalized AUCinf of the animals dosed by IV injection (Group 1).

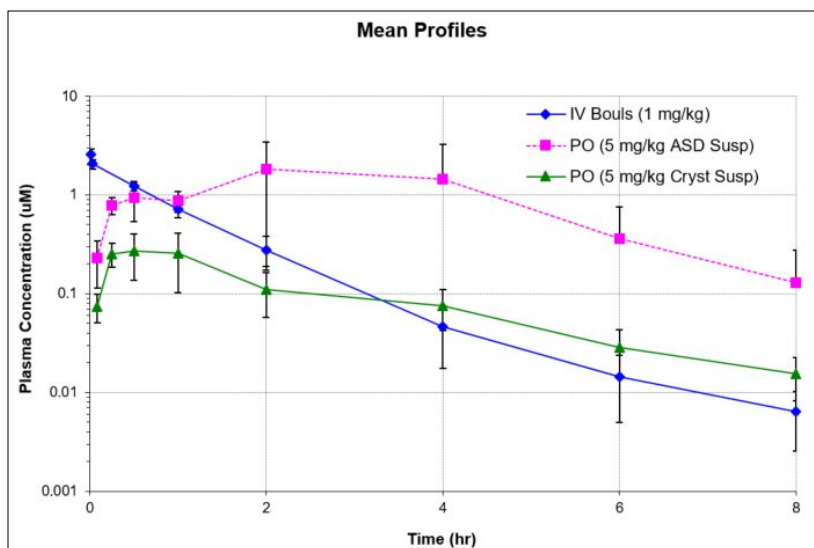

**Figure S1.** Mean total plasma concentration vs. time profiles of compound **25** after an IV bolus dose of 1 mg/kg and a PO dose of 5 mg/kg (ASD suspension) and a PO dose of mg/kg (Crystalline suspension) in male Sprague-Dawley rats, n=3, mean  $\pm$  SD.

### Dog pharmacokinetic study.

Six male beagle dogs (7-12 kg) obtained from Marshall Bioresources (Beijing, China) were divided evenly into two dose groups (n=3 dogs/group). Animals in Group 1 were given a single IV dose of 1 mg/kg compound **25** in 60% PEG400 /15% EtOH/50mM NaCitrate, pH 4.2 at 1 mL/kg. Animals in Group 2 were given 5 mg/kg PO dose of **25** in 0.5%HPMC/50mM NaCitrate, pH 3.0, as a suspension at 2 mL/kg. The blood samples were collected at 0.033, 0.083, 0.25, 0.5, 1, 3, 6, 9 and 24 after IV and PO administration. Blood was centrifuged to harvest plasma. Concentration of **25** in each plasma sample was determined by a non-validated liquid chromatography tandem mass spectrometry assay at WuXi AppTec. Pharmacokinetic (PK) analysis was performed at Genentech, Inc., using non-compartmental methods and the IV bolus input model (Model 201) or extravascular (Model 200), WinNonlin-Enterprise®, version 5.2.1. Following PO administration (Group 2), percent bioavailability (% F) was determined for each animal by dividing the dose-normalized area under the plasma concentration-time curve extrapolated to infinity (AUCinf) obtained following each PO dose by the mean dose-normalized AUCinf of the animals dosed by IV injection (Group 1).

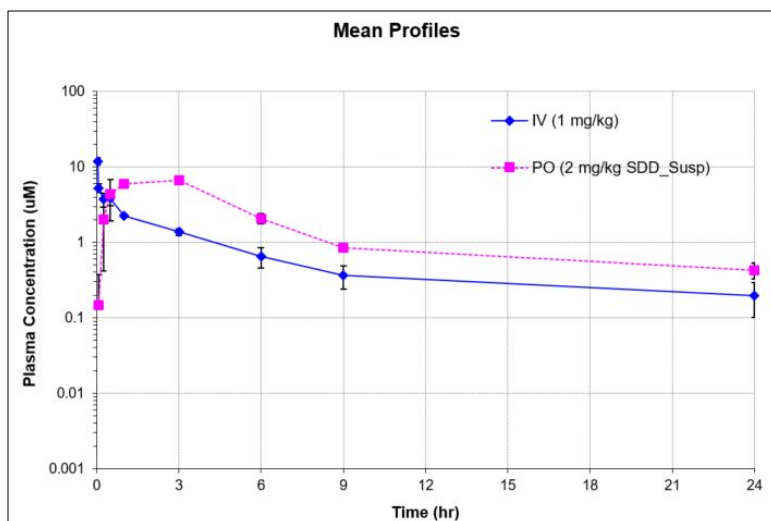

**Figure S2.** Mean total plasma concentration vs. time profiles of compound **25** after an IV dose of 1 mg/kg and a PO dose of 5 mg/kg (selective decontamination of the digestive tract [SSD] suspension) in male Beagle dogs, n=3, mean  $\pm$  SD.

### Animal Care:

*Animals were pair-housed in cages that are in accordance with applicable animal welfare laws and regulations during acclimation period.*

The room was controlled and monitored for humidity (targeted mean range 40% to 70%, and any excursion from this range for more than 3 hours will be documented as a deviation) and temperature (targeted mean range 18° to 26°C, and any excursion from this range will be documented as a deviation) with 10 to 20 air changes/hour. The room was on a 12-hour light/dark cycle except when interruptions are necessitated by study activities.

The dogs were individually housed in cages during experiment. The animals were fed twice daily. Stock dogs were fed approximately 220 grams of Certified Dog Diet daily (Beijing Vital Keao Feed Co., Ltd. Beijing, P. R. China). These amounts were adjusted as necessary based on food consumption of the group or an individual, body weight changes of the group or an individual and/or changes in the certified diet.

For fasted group (PO dose group), animals were fed the afternoon (at 3:30 to 4:00 pm) prior to the day of oral dosing and the remaining food were removed at about 8:00 pm. Food were withheld until 4-hour post-dose unless specified in this protocol. Fasted animals were fed once on the day of dosing, with the amount of approximately 220 g.

Fresh drinking water were available to all animals, ad libitum. Feed and water analyses were maintained.

#### KINASE SELECTIVITY

**Table S1.** Selectivity of **6** and **25** tested in duplicate at 1  $\mu$ M in the SelectScreen kinase assay panel (ThermoFisher Scientific; Madison, WI); the mean percent inhibition is shown. The [ATP] column indicates the concentration of ATP used in each assay: Km app means the ATP concentration was within 2-fold of the experimentally determined apparent Km in the assay; NA (Not Applicable) denotes these were binding assays and no ATP was present; and 10 or 100 are micromolar concentrations of ATP. Gray cells indicate the kinase was not tested.

| Compound 6         |        |          |          | Compound 25       |        |          |          | Compound 6         |        |          |          | Compound 25        |        |          |          |     |    |
|--------------------|--------|----------|----------|-------------------|--------|----------|----------|--------------------|--------|----------|----------|--------------------|--------|----------|----------|-----|----|
| Compound           |        | 295      | 220      | Compound          |        | 295      | 220      | Compound           |        | 295      | 220      | Compound           |        | 295      | 220      |     |    |
| Kinase Count       | [ATP]  | %Inh@1uM | %Inh@1uM | Kinase Count      | [ATP]  | %Inh@1uM | %Inh@1uM | Kinase Count       | [ATP]  | %Inh@1uM | %Inh@1uM | Kinase Count       | [ATP]  | %Inh@1uM | %Inh@1uM |     |    |
| BTK                | Km app | 70       | 56       | CaMK1             | NA     | 100      | 0        | STK3               | NA     | 2        | 4        | CK1_epsilon1       | Km app | 1        | 8        |     |    |
| Fgr                | Km app | 69       | 40       | PDGFR_alpha       | Km app | 6        | 0        | ABL                | Km app | 6        | 7        | CaMK1_delta        | Km app | 1        | 4        |     |    |
| Bmx                | Km app | 56       | 14       | CSK               | Km app | 6        | 16       | Met(1250T)         | Km app | 1        | 1        | Met(1250T)         | Km app | 1        | 1        |     |    |
| Yes                | Km app | 46       | 14       | EGFR2             | Km app | 6        | 17       | Bcr                | Km app | 6        | 17       | Bcr                | Km app | 6        | 10       |     |    |
| Lck                | Km app | 45       | 29       | GSK3_alpha        | Km app | 6        | 3        | PI3K2              | Km app | 1        | 1        | PI3K2              | Km app | 1        | 1        |     |    |
| Fyn                | Km app | 32       | 23       | EphB2             | Km app | 5        | 5        | PKC_epsilon        | Km app | 1        | 4        | HIPK1              | Km app | 1        | 1        |     |    |
| TEC                | NA     | 23       | 23       | MELK              | Km app | 5        | 5        | LTN                | Km app | 1        | 3        | PKC_epsilon        | Km app | 1        | 4        |     |    |
| Flt3(D835Y)        | Km app | 23       | 13       | PAK4              | Km app | 5        | 10       | AKT3               | Km app | 1        | 8        | AKT3               | Km app | 1        | 8        |     |    |
| LIN1K1             | NA     | 22       | 13       | PKC_beta          | Km app | 5        | 3        | MARK1              | Km app | 1        | 6        | MARK1              | Km app | 1        | 6        |     |    |
| Lyn                | Km app | 22       | 15       | p38_alpha(direct) | Km app | 5        | 19       | NEK4               | Km app | 1        | 2        | NEK4               | Km app | 1        | 2        |     |    |
| LynB               | Km app | 21       | 17       | CLK1              | Km app | 5        | 0        | MST1               | Km app | 1        | 5        | MST1               | Km app | 1        | 5        |     |    |
| CamKII_delta       | Km app | 21       | 17       | ERK1              | Km app | 5        | 8        | Rse                | Km app | 1        | 5        | Rse                | Km app | 1        | 5        |     |    |
| Fli                | Km app | 20       | 17       | TBK1              | Km app | 5        | 3        | p70S6K             | Km app | 1        | 3        | p70S6K             | Km app | 1        | 3        |     |    |
| LRRK2              | Km app | 19       | 2        | SLK               | NA     | 5        | 0        | ErbB4              | Km app | 1        | 1        | ErbB4              | Km app | 1        | 1        |     |    |
| CamKIV             | Km app | 19       | -11      | TYK2              | Km app | 5        | 5        | p38_delta          | Km app | 1        | 5        | p38_delta          | Km app | 1        | 5        |     |    |
| FGFR3              | Km app | 18       | 2        | EphA4             | Km app | 5        | 1        | CK1_gamma1         | Km app | 0        | 7        | CK1_gamma1         | Km app | 0        | 7        |     |    |
| GSK3_beta          | Km app | 18       | 20       | JAK3              | Km app | 5        | 1        | EphA5              | Km app | 0        | 2        | EphA5              | Km app | 0        | 2        |     |    |
| PKG2               | Km app | 17       | -2       | LRRK2(G2019S)     | Km app | 5        | 2        | PIM1               | Km app | 0        | 4        | PIM1               | Km app | 0        | 4        |     |    |
| MEK1               | 100    | 16       | 7        | MLK2              | NA     | 5        | -1       | CHK2               | Km app | 0        | 4        | CHK2               | Km app | 0        | 4        |     |    |
| RSK2               | Km app | 16       | 7        | PRAK              | Km app | 5        | 2        | GRK7               | Km app | 0        | 2        | GRK7               | Km app | 0        | 2        |     |    |
| MKNK2              | NA     | 16       | -11      | Ki16720I          | Km app | 5        | 5        | PKG1_alpha         | Km app | 0        | 2        | PKG1_alpha         | Km app | 0        | 2        |     |    |
| FRK                | Km app | 16       | 11       | LYN               | Km app | 5        | 5        | AKT2               | Km app | 0        | 2        | AKT2               | Km app | 0        | 2        |     |    |
| EphA1              | Km app | 16       | 8        | CLK2              | Km app | 5        | 0        | MAPKAPK2           | Km app | 0        | 7        | MAPKAPK2           | Km app | 0        | 7        |     |    |
| CDK7/cyclinH       | Km app | 15       | -12      | EphA8             | Km app | 5        | 3        | JNK2               | 100    | 0        | 0        | JNK2               | 100    | 0        | 0        |     |    |
| CSF1R              | Km app | 15       | 5        | NEK6              | Km app | 5        | 3        | SJK2               | Km app | 0        | 11       | SJK2               | Km app | 0        | 11       |     |    |
| MAPKAPK3           | Km app | 15       | -1       | CK1_gamma2        | Km app | 5        | 0        | MSSK1              | Km app | 0        | 10       | MSSK1              | Km app | 0        | 10       |     |    |
| MYLK2(eMMLCK)      | NA     | 15       | 4        | EGFR(T790M.L858R) | Km app | 5        | -1       | BrS1K1             | Km app | -1       | 1        | BrS1K1             | Km app | -1       | 1        |     |    |
| CamKII_alpha       | Km app | 15       | 6        | JNK2              | NA     | 5        | 1        | ITK                | Km app | -1       | 7        | ITK                | Km app | -1       | 7        |     |    |
| MUSK               | Km app | 15       | 4        | SVK               | Km app | 5        | 11       | mkk6(S207E.T211E)  | NA     | -1       | 1        | mkk6(S207E.T211E)  | NA     | -1       | 1        |     |    |
| Aurora_A           | Km app | 15       | 4        | SVK               | Km app | 5        | 11       | ZAP-70             | Km app | -1       | 1        | ZAP-70             | Km app | -1       | 1        |     |    |
| Sra                | Km app | 15       | 10       | ZAP-70            | Km app | 5        | 0        | ErbB2              | Km app | -1       | 4        | ErbB2              | Km app | -1       | 4        |     |    |
| SPHK1              | Km app | 14       | 7        | CK1_delta         | Km app | 4        | 1        | RAF1(Y340D.Y341D)  | NA     | -1       | 4        | RAF1(Y340D.Y341D)  | NA     | -1       | 4        |     |    |
| MARCK4             | Km app | 14       | 7        | Ki6V654A)         | NA     | 4        | 4        | RSK4               | Km app | -1       | 2        | RSK4               | Km app | -1       | 2        |     |    |
| PRKAA2             | Km app | 13       | 4        | MLK3              | NA     | 4        | 4        | NLK                | NA     | -1       | 2        | NLK                | NA     | -1       | 2        |     |    |
| MEKK3              | NA     | 13       | 4        | RIPK2             | NA     | 4        | 5        | RAF1(Y340D.Y341D)  | 100    | 0        | 0        | RAF1(Y340D.Y341D)  | 100    | 0        | 0        |     |    |
| CAMKK1             | NA     | 13       | 4        | GRK2              | Km app | 4        | 1        | Fer                | Km app | -1       | 1        | Fer                | Km app | -1       | 1        |     |    |
| ARK5               | Km app | 13       | -14      | PI3K2a            | Km app | 4        | 1        | PAK7               | Km app | -1       | 1        | PAK7               | Km app | -1       | 1        |     |    |
| SGK3               | Km app | 13       | -1       | CDK6/cyclinC      | NA     | 4        | 6        | SGK1               | Km app | -1       | 3        | SGK1               | Km app | -1       | 3        |     |    |
| FGFR1              | Km app | 12       | 17       | MRCK_alpha        | Km app | 4        | 11       | PKC_delta          | Km app | -2       | 0        | PKC_delta          | Km app | -2       | 0        |     |    |
| PKA8               | Km app | 12       | 17       | CDK5/p25          | Km app | 4        | 3        | Tie2               | Km app | -2       | -1       | Tie2               | Km app | -2       | -1       |     |    |
| CDK9/cyclinK       | Km app | 12       | 10       | FAK2              | Km app | 4        | 0        | CDK5/p35           | Km app | -2       | 0        | CDK5/p35           | Km app | -2       | 0        |     |    |
| KDR                | Km app | 12       | 10       | TAD2              | Km app | 4        | 0        | SPHK2              | 10     | -2       | 0        | SPHK2              | 10     | -2       | 0        |     |    |
| JNK1_alpha1        | NA     | 12       | 1        | MKK6              | 100    | 4        | 2        | DDR2               | NA     | -2       | 0        | DDR2               | NA     | -2       | 0        |     |    |
| PKC_gamma          | Km app | 12       | 15       | Ron               | Km app | 4        | 3        | JNK3               | 100    | -2       | 2        | JNK3               | 100    | -2       | 2        |     |    |
| TTK                | NA     | 12       | 15       | Aurora_B          | Km app | 4        | 12       | BRAF               | NA     | -2       | 2        | BRAF               | NA     | -2       | 2        |     |    |
| Mnk1               | Km app | 11       | 17       | TYRK1B            | Km app | 4        | 2        | Phk_gamma1         | Km app | -2       | -16      | Phk_gamma1         | Km app | -2       | -16      |     |    |
| Hck                | Km app | 11       | 2        | NEK7              | Km app | 4        | 2        | SGK2               | Km app | -2       | 2        | SGK2               | Km app | -2       | 2        |     |    |
| RSK3               | Km app | 11       | 2        | PI3K2b            | 10     | 4        | 4        | MST4               | Km app | -2       | 6        | MST4               | Km app | -2       | 6        |     |    |
| TrkA               | Km app | 11       | -11      | IRAK4             | Km app | 4        | 12       | CLK3               | Km app | -2       | 4        | CLK3               | Km app | -2       | 4        |     |    |
| PKC_eta            | Km app | 10       | 2        | ZFPK              | Km app | 4        | 9        | ROCK1              | Km app | -2       | 4        | ROCK1              | Km app | -2       | 4        |     |    |
| WEE1               | NA     | 10       | 2        | ZIFK              | Km app | 4        | 9        | MST2               | Km app | -3       | 5        | MST2               | Km app | -3       | 5        |     |    |
| CAMKK2             | NA     | 10       | -2       | MRCK_beta         | Km app | 4        | 1        | PLK2               | Km app | -3       | 4        | PLK2               | Km app | -3       | 4        |     |    |
| Axl                | Km app | 10       | -4       | STK16             | NA     | 4        | 1        | NEK1               | Km app | -3       | 12       | NEK1               | Km app | -3       | 12       |     |    |
| PKC_alpha          | Km app | 9        | 7        | TXK               | Km app | 4        | 6        | NEK2               | Km app | -3       | 11       | NEK2               | Km app | -3       | 11       |     |    |
| TSK1               | Km app | 9        | 9        | ACV2B             | Km app | 4        | 9        | IKK_beta           | Km app | -3       | 3        | IKK_beta           | Km app | -3       | 3        |     |    |
| p38_alpha          | 100    | 9        | 9        | CDK9/cyclinT1     | Km app | 4        | 2        | NEK9               | Km app | -3       | 3        | NEK9               | Km app | -3       | 3        |     |    |
| GCK                | Km app | 9        | 14       | MKNK1             | Km app | 4        | 2        | PDGFR_alpha(T674I) | Km app | -3       | 0        | PDGFR_alpha(T674I) | Km app | -3       | 0        |     |    |
| Tip2               | 100    | 9        | 14       | MSK2              | Km app | 4        | 0        | HIPK2              | Km app | -3       | 0        | HIPK2              | Km app | -3       | 0        |     |    |
| DAPK1              | Km app | 9        | -1       | PKD2              | Km app | 4        | 0        | GRK5               | Km app | -3       | -1       | GRK5               | Km app | -3       | -1       |     |    |
| MKK6               | Km app | 9        | -1       | mTOR              | Km app | 4        | 0        | JAK1               | Km app | -3       | 4        | JAK1               | Km app | -3       | 4        |     |    |
| PDGFR_alpha(V561D) | Km app | 9        | 9        | CDK1/cyclinB      | Km app | 3        | 9        | LIMK2              | NA     | -3       | 8        | LIMK2              | NA     | -3       | 8        |     |    |
| PDGFR_beta         | Km app | 9        | 9        | IKK_alpha         | Km app | 3        | 8        | PI3K-C             | Km app | -3       | 8        | PI3K-C             | Km app | -3       | 8        |     |    |
| EGFR(T790M)        | Km app | 9        | 7        | Insr              | Km app | 3        | 4        | EphB4              | Km app | -4       | 3        | EphB4              | Km app | -4       | 3        |     |    |
| IRAK1              | Km app | 9        | 7        | Mer               | Km app | 3        | 4        | Phk_gamma2         | Km app | -4       | 3        | Phk_gamma2         | Km app | -4       | 3        |     |    |
| PKC_beta2          | Km app | 9        | 9        | CK1_gamma3        | Km app | 3        | 4        | Aurora_C           | Km app | -4       | 3        | Aurora_C           | Km app | -4       | 3        |     |    |
| FGFR4              | Km app | 8        | 10       | PrkX              | Km app | 3        | 1        | MEK2               | 100    | -4       | 0        | MEK2               | 100    | -4       | 0        |     |    |
| IKK_epsilon        | Km app | 8        | 9        | CLK4              | NA     | 3        | 5        | PI3K3_hVPS34       | Km app | -4       | 10       | PI3K3_hVPS34       | Km app | -4       | 10       |     |    |
| JNK1_alpha1        | 100    | 8        | 8        | PKC_beta1         | Km app | 3        | 5        | p38_beta           | Km app | -4       | 10       | p38_beta           | Km app | -4       | 10       |     |    |
| PK1(direct)        | Km app | 8        | 3        | KHS1              | Km app | 3        | 14       | BRAF               | 100    | -5       | 0        | BRAF               | 100    | -5       | 0        |     |    |
| TSSK2              | Km app | 8        | 3        | Ron               | Km app | 3        | -2       | JAK2               | Km app | -5       | 2        | JAK2               | Km app | -5       | 2        |     |    |
| TrkC               | Km app | 8        | 3        | EGFR(L858R)       | Km app | 3        | 2        | EphB1              | Km app | -5       | 7        | EphB1              | Km app | -5       | 7        |     |    |
| DNA-PK             | Km app | 8        | 3        | EphB3             | Km app | 3        | 4        | DYRK4              | Km app | -5       | 1        | DYRK4              | Km app | -5       | 1        |     |    |
| FGFR3(K650E)       | Km app | 8        | 3        | Frk               | Km app | 3        | 13       | GRK6               | Km app | -5       | 3        | GRK6               | Km app | -5       | 3        |     |    |
| DRAK1              | NA     | 8        | 3        | MST3              | Km app | 3        | 13       | PDGFR_alpha(D842V) | Km app | -5       | 3        | PDGFR_alpha(D842V) | Km app | -5       | 3        |     |    |
| PRK1               | Km app | 8        | -2       | TrkB              | Km app | 3        | 0        | TAG3               | NA     | -5       | 0        | TAG3               | NA     | -5       | 0        |     |    |
| WNK2               | NA     | 8        | 3        | BMPRI1A           | NA     | 3        | 3        | Haspin             | Km app | -5       | 0        | Haspin             | Km app | -5       | 0        |     |    |
| FGFR2              | Km app | 8        | 11       | CK1_alpha1        | Km app | 3        | 7        | MLK1               | Km app | -6       | 6        | MLK1               | Km app | -6       | 6        |     |    |
| MAP4K4             | Km app | 8        | 11       | AKT1              | Km app | 2        | 3        | NIK                | NA     | -6       | 15       | NIK                | NA     | -6       | 15       |     |    |
| Fes                | Km app | 7        | -1       | DMPK              | NA     | 2        | 1        | YSK1               | Km app | -7       | 11       | YSK1               | Km app | -7       | 11       |     |    |
| JNK3               | NA     | 7        | 3        | MSK1              | Km app | 2        | -1       | ASK1               | NA     | -8       | -3       | ASK1               | NA     | -8       | -3       |     |    |
| Anj                | Km app | 7        | 3        | PKC_theta         | Km app | 2        | 15       | ALK2               | NA     | -9       | 5        | ALK2               | NA     | -9       | 5        |     |    |
| Mer                | Km app | 7        | 15       | PKD3              | Km app | 2        | 0        | EphA7              | NA     | -9       | 7        | EphA7              | NA     | -9       | 7        |     |    |
| p38_gamma          | Km app | 7        | 11       | DCAMKL2           | Km app | 2        | 0        | Kif                | Km app | -9       | 13       | Kif                | Km app | -9       | 13       |     |    |
| MARK2              | Km app | 7        | 4        | IGF1R             | Km app | 2        | 6        | PI3K-A             | Km app | -10      | -8       | PI3K-A             | Km app | -10      | -8       |     |    |
| eEF-2K             | Km app | 7        | 4        | PRKAA1            | Km app | 2        | 4        | IRB                | 6      | Km app   | -10      | -1                 | IRB    | 6        | Km app   | -10 | -1 |
| Ret                | Km app | 7        | 10       | PAK1              | Km app | 2        | 8        | MYLK2(eMMLCK)      | Km app | -11      | 6        | MYLK2(eMMLCK)      | Km app | -11      | 6        |     |    |
| MEK1               | NA     | 7        | 4        | SRPK2             | Km app | 2        | 3        | MEK3               | NA     | -13      | 6        | MEK3               | NA     | -13      | 6        |     |    |
| TAK1-TAB1          | NA     | 7        | 8        | GRK3              | Km app | 2        | 2        | ACVR1B             | Km app | -13      | 6        | ACVR1B             | Km app | -13      | 6        |     |    |
| TGFBF1             | NA     | 7        | 7        | PLK1              | Km app | 2        | 3        | PI3K-D             | Km app | -13      | 6        | PI3K-D             | Km app | -13      | 6        |     |    |
| PKA                | Km app | 6        | -7       | CaMKII_beta       | Km app | 2        | -5       | FAK2               | Km app | -19      | 0        | FAK2               |        |          |          |     |    |

|     |    |             |
|-----|----|-------------|
| Fgr | 40 | 69 (387 nM) |
| Bmx | 14 | 56 (351 nM) |



## CRYSTALLOGRAPHY

Btk kinase domain protein was expressed in insect cells, purified, and crystallized as previously described<sup>3</sup>. Diffraction data for the complex of Btk and **25** were collected at beamline 21-IDF of the Advanced Photon Source, and the data were integrated and scaled in HKL2000<sup>5</sup>. The structure was determined by molecular replacement in space group  $P6_1$  with PHASER<sup>6</sup>, and with unit cell dimensions  $a=b=108.3\text{\AA}$ ,  $c=42.2\text{\AA}$ ,  $\alpha=\beta=90^\circ$ , and  $\gamma=120^\circ$ , with one protein molecule in the asymmetric unit. Clear electron density of the inhibitor (Figure S3) was observed in all protein molecules. The structure was refined in PHENIX<sup>7</sup> (Table S3).

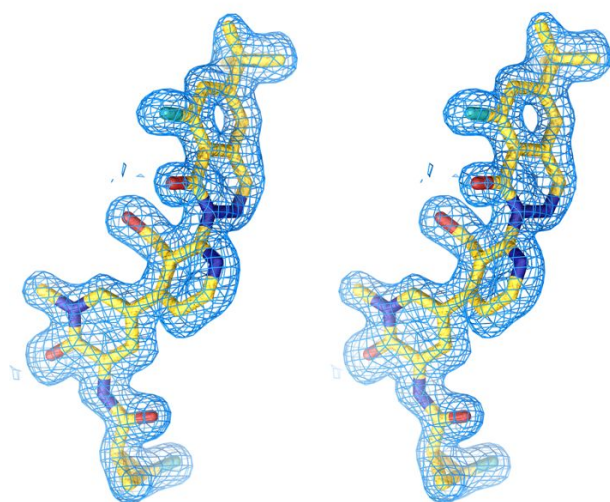

**Figure S3: Electron density map of inhibitor 25 in complex with Btk.** Divergent eye stereo diagram of the simulated annealing composite omit difference electron density map,  $(2m|F_o| - D|F_c|) \exp(i\alpha_c)$ , of the Btk inhibitor **25**, contoured at  $1\sigma$ .

**Table S3: Btk crystallographic data collection and refinement statistics.**

|                                           |                 |
|-------------------------------------------|-----------------|
| PDB code                                  | <b>6XE4</b>     |
| Compound #                                | <b>25</b>       |
| Beamline                                  | APS 21-IDF      |
| Wavelength (Å)                            | 0.97872         |
| Space group                               | P6 <sub>1</sub> |
| Kinase molecules in ASU                   | 1               |
| Resolution range (Å)                      | 35.0-1.60       |
| Highest resolution bin (Å)                | 1.63 – 1.60     |
| Redundancy                                | 7.6 (6.0)       |
| Completeness (%)                          | 98.8 (93.9)     |
| Mean I/σ <sub>I</sub>                     | 13.8 (2.4)      |
| R <sub>merge</sub> (%)                    | 8.5 (80.2)      |
| CC ½ highest bin                          | 0.54            |
| <b>Refinement</b>                         |                 |
| Resolution range (Å)                      | 33.3 – 1.60     |
| No. reflections (R <sub>free</sub> set)   | 37,117 (1,912)  |
| R <sub>work</sub> , R <sub>free</sub> (%) | 18.0, 15.6      |
| No. non-hydrogen atoms in ASU             | 2,498           |
| No. water molecules in ASU                | 276             |
| Rmsd bond lengths (Å)                     | 0.005           |
| Rmsd bond angles (°)                      | 0.792           |
| Molprobity clash score                    | 0.69            |
| Ramachandran most favored region          | 98.1%           |
| Ramachandran outlier region               | 0%              |

Values in parentheses represent data from the highest resolution shell.

## SI REFERENCES

- (1) Crawford, J. J.; Johnson, A. R.; Misner, D. L.; Belmont, L. D.; Castanedo, G.; Choy, R.; Coraggio, M.; Dong, L.; Eigenbrot, C.; Erickson, R.; Ghilardi, N.; Hau, J.; Katewa, A.; Kohli, P. B.; Lee, W.; Lubach, J. W.; McKenzie, B. S.; Ortwine, D. F.; Schutt, L.; Tay, S.; Wei, B.; Reif, K.; Liu, L.; Wong, H.; Young, W. B. Discovery of GDC-0853: A Potent, Selective, and Noncovalent Bruton's Tyrosine Kinase Inhibitor in Early Clinical Development. *Journal of Medicinal Chemistry* **2018**, *61* (6), 2227–2245. (See also, *Supporting Information*).
- (2) Obach, R. S.; Baxter, J. G.; Liston, T. E.; Silber, B. M.; Jones, B. C.; MacIntyre, F.; Rance, D. J.; Wastall, P. The prediction of human pharmacokinetic parameters from preclinical and in vitro metabolism data. *J. Pharmacol. Exp. Ther.* **1997**, *283* (1), 46–58.
- (3) Halladay, J. S.; Delarosa, E. M.; Tran, D.; Wang, L.; Wong, S.; Khojasteh, S. C. High-throughput, 384-well, LC-MS/MS CYP inhibition assay using automation, cassette-analysis technique, and streamlined data analysis. *Drug. Metab. Lett.* **2011**, *5* (3), 220–30.
- (4) Fridericia, L. S. The duration of systole in the electrocardiogram of normal subjects and of patients with heart disease. *Acta Medica Scandinavica* **1920**, *53*, 469–486.
- (5) Otwinowski, Z.; Minor, W., [20] Processing of X-ray diffraction data collected in oscillation mode. In *Methods in Enzymology*, Academic Press: **1997**, *276*, 307–326.
- (6) McCoy, A. J.; Oeffner, R. D.; Wrobel, A. G.; Ojala, J. R. M.; Tryggvason, K.; Lohkamp, B.; Read, R. J., Ab initio solution of macromolecular crystal structures without direct methods. *Proc. Natl. Acad. Sci. U. S. A.* **2017**, *114* (14), 3637–3641.
- (7) Adams, P. D.; Afonine, P. V.; Bunkoczi, G.; Chen, V. B.; Davis, I. W.; Echols, N.; Headd, J. J.; Hung, L.-W.; Kapral, G. J.; Grosse-Kunstleve, R. W.; McCoy, A. J.; Moriarty, N. W.; Oeffner, R.; Read, R. J.; Richardson, D. C.; Richardson, J. S.; Terwilliger, T. C.; Zwart, P. H., PHENIX: a comprehensive Python-based system for macromolecular structure solution. *Acta Cryst. D* **2010**, *66* (2), 213–221
